# Supplementary material for: Whole-genome sequencing identifies recurrent somatic NOTCH2 mutations in splenic marginal zone lymphoma
Source: PubMed Central journal article supplement — J Exp Med. 2012 Aug 27;209(9):1553–65. doi: 10.1084/jem.20120910 (PMC3428949; doi:10.1084/jem.20120910), 2012-08-27
Supplement: supp_jem.20120910_JEM_20120910_sm.pdf [file supp_jem.20120910_JEM_20120910_sm.pdf]

**SUPPLEMENTAL MATERIAL**

Kiel et al., <http://www.jem.org/cgi/content/full/jem.20120910/DC1>

**Table S1. Genes involved in structural alterations**

| Genome | LeftChr | LeftPosition | LeftStrand | Left gene | RightChr | RightPosition | RightStrand | Right gene | Interchromosomal | StrandConsistent | Distance | Displayed |
|--------|---------|--------------|------------|-----------|----------|---------------|-------------|------------|------------------|------------------|----------|-----------|
| A01    | chr1    | 10,543,646   | +          | PEX14     | chr1     | 10,546,089    | +           | PEX14      | N                | Y                | 2,443    |           |
| A01    | chr1    | 78,833,897   | +          | MGC27382  | chr1     | 78,835,838    | +           |            | N                | Y                | 1,941    |           |
| A01    | chr1    | 246,368,887  | +          | SMYD3     | chr1     | 246,388,776   | +           | SMYD3      | N                | Y                | 19,889   |           |
| A01    | chr2    | 41,913,661   | +          |           | chr6     | 13,191,446    | -           | PHACTR1    | Y                | N                |          | yes       |
| A01    | chr2    | 51,748,064   | -          |           | chr6     | 117,811,873   | -           | DCBLD1     | Y                | Y                |          | yes       |
| A01    | chr2    | 51,748,196   | +          |           | chr6     | 117,811,877   | +           | DCBLD1     | Y                | Y                |          | yes       |
| A01    | chr2    | 55,634,190   | +          | CCDC88A   | chr2     | 55,636,191    | +           | CCDC88A    | N                | Y                | 2,001    |           |
| A01    | chr2    | 77,657,786   | +          | LRRTM4    | chr2     | 77,659,139    | +           | LRRTM4     | N                | Y                | 1,353    |           |
| A01    | chr2    | 144,011,246  | +          | ARHGAP15  | chr6     | 154,152,886   | -           |            | Y                | N                |          | yes       |
| A01    | chr2    | 175,507,361  | +          | WIPF1     | chr2     | 175,508,424   | +           | WIPF1      | N                | Y                | 1,063    |           |
| A01    | chr3    | 9,696,986    | +          | MTMR14    | chr3     | 9,697,814     | +           | MTMR14     | N                | Y                | 828      |           |
| A01    | chr3    | 30,865,778   | +          | GADL1     | chr3     | 30,866,269    | +           | GADL1      | N                | Y                | 491      |           |
| A01    | chr3    | 120,161,644  | +          | FSTL1     | chr3     | 120,164,951   | +           | FSTL1      | N                | Y                | 3,307    |           |
| A01    | chr3    | 123,135,519  | +          | ADCY5     | chr3     | 123,136,265   | +           | ADCY5      | N                | Y                | 746      |           |
| A01    | chr3    | 152,879,998  | -          |           | chrX     | 76,982,473    | -           | ATRX       | Y                | Y                |          | yes       |
| A01    | chr3    | 172,715,821  | -          | SPATA16   | chr3     | 173,133,709   | +           | NLGN1      | N                | N                | 417,888  |           |
| A01    | chr4    | 10,544,912   | +          | CLNK      | chr4     | 10,552,747    | +           | CLNK       | N                | Y                | 7,835    |           |
| A01    | chr4    | 17,982,341   | +          | LCORL     | chr4     | 17,983,912    | +           | LCORL      | N                | Y                | 1,571    |           |
| A01    | chr4    | 83,636,008   | +          | SCD5      | chr4     | 83,641,270    | +           | SCD5       | N                | Y                | 5,262    |           |
| A01    | chr4    | 113,564,756  | -          | LARP7     | chr4     | 113,578,883   | -           |            | N                | Y                | 14,127   |           |
| A01    | chr4    | 144,298,455  | +          | GAB1      | chr4     | 144,299,530   | +           | GAB1       | N                | Y                | 1,075    |           |
| A01    | chr4    | 144,307,924  | +          | GAB1      | chr4     | 144,308,523   | +           | GAB1       | N                | Y                | 599      |           |
| A01    | chr5    | 16,869,967   | +          | MYO10     | chr5     | 16,870,995    | +           | MYO10      | N                | Y                | 1,028    |           |
| A01    | chr5    | 80,354,955   | +          | RASGRF2   | chr5     | 80,355,664    | +           | RASGRF2    | N                | Y                | 709      |           |
| A01    | chr5    |              | +          | FGF1      | chr5     |               | +           | FGF1       | N                | Y                |          |           |

|     |       |             |   |          |       |             |   |          |   |   |        |
|-----|-------|-------------|---|----------|-------|-------------|---|----------|---|---|--------|
| A01 | chr6  | 141,999,406 | + | BCKDHB   | chr6  | 141,999,982 | + | BCKDHB   | N | Y | 576    |
| A01 | chr7  | 80,993,706  | + | 40800    | chr7  | 80,999,802  | + | 40800    | N | Y | 6,096  |
| A01 | chr7  | 55,913,756  | + | ZAN      | chr7  | 55,917,452  | + | ZAN      | N | Y | 3,696  |
| A01 | chr7  | 100,341,310 | + | CTTNBP2  | chr7  | 100,343,319 | + | CTTNBP2  | N | Y | 2,009  |
|     |       | 117,455,132 |   |          |       | 117,459,638 |   |          |   |   | 4,506  |
| A01 | chr7  | 134,919,336 | + | STRA8    | chr7  | 134,920,501 | + | STRA8    | N | Y | 1,165  |
| A01 | chr7  |             | + | DENND2A  | chr7  |             | + | DENND2A  | N | Y |        |
|     |       | 140,231,450 |   |          |       | 140,231,914 |   |          |   |   | 464    |
| A01 | chr7  | 157,671,001 | + | PTPRN2   | chr7  | 157,671,947 | + | PTPRN2   | N | Y | 946    |
| A01 | chr8  | 124,958,894 | + | FER1L6   | chr8  | 124,961,978 | + | FER1L6   | N | Y | 3,084  |
| A01 | chr9  |             | + | KANK1    | chr9  |             | + | KANK1    | N | Y |        |
|     |       | 642,168     |   |          |       | 648,239     |   |          |   |   | 6,071  |
| A01 | chr9  | 119,513,452 | - | ASTN2    | chr9  | 119,515,996 | - | ASTN2    | N | Y | 2,544  |
| A01 | chr9  | 126,616,998 | + | DENND1A  | chr9  | 126,617,683 | + | DENND1A  | N | Y | 685    |
| A01 | chr10 | 68,169,701  | + | CTNNA3   | chr10 | 68,217,728  | + | CTNNA3   | N | Y | 48,027 |
| A01 | chr10 | 76,888,531  | + | SAMD8    | chr10 | 76,895,652  | + | SAMD8    | N | Y | 7,121  |
| A01 | chr11 | 19,079,343  | + | MRGPRX2  | chr11 | 19,080,395  | + | MRGPRX2  | N | Y | 1,052  |
| A01 | chr11 | 19,079,350  | - | MRGPRX2  | chr11 | 19,080,724  | - | MRGPRX2  | N | Y | 1,374  |
| A01 | chr11 | 65,933,634  | + | PACS1    | chr11 | 65,939,063  | + | PACS1    | N | Y | 5,429  |
| A01 | chr11 | 66,657,990  | + | PC       | chr11 | 66,658,904  | + | PC       | N | Y | 914    |
| A01 | chr11 | 71,660,390  | + | RNF121   | chr11 | 71,660,973  | + | RNF121   | N | Y | 583    |
| A01 | chr12 | 44,691,832  | + | TMEM117  | chr12 | 44,692,914  | + | TMEM117  | N | Y | 1,082  |
| A01 | chr12 | 53,595,998  | + | ITGB7    | chr12 | 53,596,600  | + | ITGB7    | N | Y | 602    |
| A01 | chr12 | 86,695,694  | + | MGAT4C   | chr12 | 86,703,066  | + | MGAT4C   | N | Y | 7,372  |
| A01 | chr12 | 129,787,758 | + | TMEM132D | chr12 | 129,788,178 | + | TMEM132D | N | Y | 420    |
| A01 | chr13 | 26,024,956  | + | ATP8A2   | chr13 | 26,026,278  | + | ATP8A2   | N | Y | 1,322  |
| A01 | chr13 | 93,363,496  | + | GPC5     | chr13 | 93,364,985  | + | GPC5     | N | Y | 1,489  |
| A01 | chr14 | 33,603,568  | + | NPAS3    | chr14 | 33,632,183  | + | NPAS3    | N | Y | 28,615 |
| A01 | chr14 | 79,159,147  | + | NRXN3    | chr14 | 79,165,647  | + | NRXN3    | N | Y | 6,500  |
| A01 | chr16 | 131,680     | + | MPG      | chr16 | 132,250     | + | MPG      | N | Y | 570    |
| A01 | chr16 | 81,407,483  | - | GAN      | chr16 | 81,408,094  | - | GAN      | N | Y | 611    |
| A01 | chr17 | 2,398,975   | + | METTL16  | chr17 | 2,402,799   | + | METTL16  | N | Y | 3,824  |
| A01 | chr17 | 33,681,081  | + | SLFN11   | chr17 | 33,689,757  | + | SLFN11   | N | Y | 8,676  |

|     |       |             |   |          |       |             |   |          |   |   |        |     |
|-----|-------|-------------|---|----------|-------|-------------|---|----------|---|---|--------|-----|
| A01 | chr17 | 33,687,392  | + | SLFN11   | chr17 | 33,689,759  | + | SLFN11   | N | Y | 2,367  |     |
| A01 | chr17 | 33,690,847  | + | SLFN11   | chr17 | 33,700,494  | + | SLFN11   | N | Y | 9,647  |     |
| A01 | chr17 | 73,052,506  | - | KCTD2    | chr17 | 73,054,209  | - | KCTD2    | N | Y | 1,703  |     |
| A01 | chr19 | 17,794,376  | + | UNC13A   | chr19 | 17,794,814  | + | UNC13A   | N | Y | 438    |     |
| A01 | chr19 | 23,856,633  | + | ZNF675   | chr19 | 23,866,242  | + | ZNF675   | N | Y | 9,609  |     |
| A01 | chr19 | 53,477,443  | + | ZNF702P  | chr19 | 53,477,962  | + | ZNF702P  | N | Y | 519    |     |
| A01 | chr22 | 49,074,729  | + | FAM19A5  | chr22 | 49,075,600  | + | FAM19A5  | N | Y | 871    |     |
| A01 | chrX  | 2,351,840   | - | DHRX     | chrX  | 2,355,063   | - | DHRX     | N | Y | 3,223  |     |
| A01 | chrX  | 135,331,945 | + | MAP7D3   | chrX  | 135,332,550 | + | MAP7D3   | N | Y | 605    |     |
| B01 | chr2  | 77,686,969  | - | LRRTM4   | chr2  | 77,693,012  | - | LRRTM4   | N | Y | 6,043  |     |
| B01 | chr2  | 77,687,039  | + | LRRTM4   | chr2  | 77,693,083  | + | LRRTM4   | N | Y | 6,044  |     |
| B01 | chr2  | 143,926,139 | + | ARHGAP15 | chr2  | 143,927,714 | + | ARHGAP15 | N | Y | 1,575  |     |
| B01 | chr4  | 71,802,258  | + | MOBK11A  | chr4  | 71,804,751  | + | MOBK11A  | N | Y | 2,493  |     |
| B01 | chr7  | 138,363,473 | - | SVOPL    | chr7  | 138,365,051 | - |          | N | Y | 1,578  |     |
| B01 | chr7  | 157,769,125 | + | PTPRN2   | chr7  | 157,772,013 | + | PTPRN2   | N | Y | 2,888  |     |
| B01 | chr9  | 21,842,086  | + | MTAP     | chr9  | 21,854,133  | + | MTAP     | N | Y | 12,047 |     |
| B01 | chr9  | 22,252,932  | - |          | chr13 | 67,763,729  | + | PCDH9    | Y | N |        | yes |
| B01 | chr10 | 103,445,737 | + | FBXW4    | chr10 | 103,446,338 | + | FBXW4    | N | Y | 601    |     |
| B01 | chr11 | 84,563,723  | - | DLG2     | chr11 | 84,565,261  | - | DLG2     | N | Y | 1,538  |     |
| B01 | chr11 | 84,563,800  | + | DLG2     | chr11 | 84,565,277  | + | DLG2     | N | Y | 1,477  |     |
| B01 | chr11 | 94,080,417  | - |          | chrX  | 73,718,032  | - | SLC16A2  | Y | Y |        | yes |
| B01 | chr12 | 53,595,998  | + | ITGB7    | chr12 | 53,596,600  | + | ITGB7    | N | Y | 602    |     |
| B01 | chr12 | 70,679,895  | + | CNOT2    | chr12 | 70,680,974  | - | CNOT2    | N | N | 1,079  |     |
| B01 | chr12 | 70,680,612  | - | CNOT2    | chr12 | 70,682,065  | + | CNOT2    | N | N | 1,453  |     |
| B01 | chr12 | 104,730,691 | + | TXNRD1   | chr12 | 104,732,448 | + | TXNRD1   | N | Y | 1,757  |     |
| B01 | chr13 | 21,730,905  | + | SKA3     | chr13 | 21,731,227  | + | SKA3     | N | Y | 322    |     |
| B01 | chr14 | 79,159,149  | + | NRXN3    | chr14 | 79,165,649  | + | NRXN3    | N | Y | 6,500  |     |
| B01 | chr17 | 9,749,059   | + | GLP2R    | chr17 | 9,749,587   | + | GLP2R    | N | Y | 528    |     |
| B01 | chr17 | 33,681,081  | + | SLFN11   | chr17 | 33,689,757  | + | SLFN11   | N | Y | 8,676  |     |
| B01 | chr17 | 33,690,846  | + | SLFN11   | chr17 | 33,700,493  | + | SLFN11   | N | Y | 9,647  |     |
| B01 | chr18 |             | + | PIK3C3   | chr18 |             | + | PIK3C3   | N | Y |        |     |

|     |       |             |   |         |       |             |   |         |   |   |           |     |
|-----|-------|-------------|---|---------|-------|-------------|---|---------|---|---|-----------|-----|
|     |       | 39,626,845  |   |         |       | 39,627,703  |   |         |   |   | 858       |     |
| B01 | chr19 | 17,359,252  | + |         | chr19 | 17,361,016  | + | USHBP1  | N | Y | 1,764     |     |
| B01 | chr19 | 37,922,139  | + | ZNF569  | chr19 | 38,018,371  | + | ZNF793  | N | Y | 96,232    |     |
| B01 | chr21 | 22,852,029  | + | NCAM2   | chr21 | 22,852,660  | + | NCAM2   | N | Y | 631       |     |
| B01 | chr21 | 36,203,887  | + | RUNX1   | chr21 | 36,204,890  | + | RUNX1   | N | Y | 1,003     |     |
| B01 | chr22 | 17,257,507  | + |         | chr22 | 17,273,377  | + | XKR3    | N | Y | 15,870    |     |
| B01 | chr22 | 34,308,986  | - | LARGE   | chr22 | 34,311,623  | + | LARGE   | N | N | 2,637     |     |
| B01 | chr22 | 34,309,375  | + | LARGE   | chr22 | 34,309,889  | - | LARGE   | N | N | 514       |     |
| C01 | chr1  | 53,499,006  | - | SCP2    | chr1  | 53,499,667  | - | SCP2    | N | Y | 661       |     |
| C01 | chr1  | 159,020,405 | + | IFI16   | chr1  | 159,021,049 | + | IFI16   | N | Y | 644       |     |
| C01 | chr1  | 235,351,893 | + | ARID4B  | chr1  | 235,355,320 | + | ARID4B  | N | Y | 3,427     |     |
| C01 | chr2  | 153,491,852 | + | FMNL2   | chr2  | 153,493,458 | - | FMNL2   | N | N | 1,606     |     |
| C01 | chr2  | 153,492,542 | - | FMNL2   | chr2  | 153,495,278 | + | FMNL2   | N | N | 2,736     |     |
| C01 | chr2  | 187,015,782 | + |         | chr7  | 99,015,637  | - | BUD31   | Y | N |           | yes |
| C01 | chr2  | 187,019,774 | - |         | chr7  | 99,015,451  | + | BUD31   | Y | N |           | yes |
| C01 | chr4  | 152,732,426 | - |         | chr5  | 121,670,726 | - | SNCAIP  | Y | Y |           | yes |
| C01 | chr4  | 152,732,633 | + |         | chr5  | 121,670,722 | + | SNCAIP  | Y | Y |           | yes |
| C01 | chr5  | 63,885,142  | + | RGS7BP  | chr5  | 63,886,316  | + | RGS7BP  | N | Y | 1,174     |     |
| C01 | chr5  | 129,480,450 | + | CHSY3   | chr5  | 129,481,193 | + | CHSY3   | N | Y | 743       |     |
| C01 | chr6  | 102,427,787 | + | GRIK2   | chr6  | 102,428,220 | + | GRIK2   | N | Y | 433       |     |
| C01 | chr7  | 4,252,922   | + | SDK1    | chr7  | 4,253,863   | + | SDK1    | N | Y | 941       |     |
| C01 | chr7  | 110,121,351 | - |         | chr7  | 110,384,334 | - | IMMP2L  | N | Y | 262,983   |     |
| C01 | chr7  | 120,494,993 | + | TSPAN12 | chr7  | 120,496,061 | + | TSPAN12 | N | Y | 1,068     |     |
| C01 | chr9  | 15,231,269  | + | TTC39B  | chr9  | 15,371,978  | + |         | N | Y | 140,709   |     |
| C01 | chr9  | 131,556,898 | + | TBC1D13 | chr9  | 131,557,883 | + | TBC1D13 | N | Y | 985       |     |
| C01 | chr10 | 56,445,983  | - | PCDH15  | chr10 | 56,469,598  | - | PCDH15  | N | Y | 23,615    |     |
| C01 | chr10 | 88,050,480  | + | GRID1   | chr10 | 90,938,333  | - |         | N | N | 2,887,853 | yes |
| C01 | chr10 | 88,716,882  | + | MMRN2   | chr10 | 89,537,630  | - | ATAD1   | N | N | 820,748   | yes |
| C01 | chr10 | 90,125,761  | + | RNLS    | chr10 | 90,690,776  | - |         | N | N | 565,015   | yes |
| C01 | chr10 | 117,655,951 | - | ATRNL1  | chr10 | 117,660,063 | - | ATRNL1  | N | Y | 4,112     |     |
| C01 | chr11 | 34,172,148  | - |         | chr11 | 34,174,106  | - | ABTB2   | N | Y | 1,958     |     |

|     |       |             |   |          |       |             |   |          |   |   |         |     |
|-----|-------|-------------|---|----------|-------|-------------|---|----------|---|---|---------|-----|
| C01 | chr11 | 121,962,273 | + | MIR100HG | chr11 | 122,722,674 | + | CRTAM    | N | Y | 760,401 | yes |
| C01 | chr12 | 53,595,998  | + | ITGB7    | chr12 | 53,596,600  | + | ITGB7    | N | Y | 602     |     |
| C01 | chr17 | 18,234,030  | - | SHMT1    | chr17 | 18,234,369  | - | SHMT1    | N | Y | 339     |     |
| C01 | chr17 | 33,681,092  | + | SLFN11   | chr17 | 33,689,757  | + | SLFN11   | N | Y | 8,665   |     |
| C01 | chr17 | 33,687,392  | + | SLFN11   | chr17 | 33,689,759  | + | SLFN11   | N | Y | 2,367   |     |
| C01 | chr17 | 33,690,846  | + | SLFN11   | chr17 | 33,700,493  | + | SLFN11   | N | Y | 9,647   |     |
| C01 | chr17 | 43,364,665  | + | MAP3K14  | chr17 | 43,372,175  | + | MAP3K14  | N | Y | 7,510   |     |
| C01 | chr18 | 77,869,498  | - | ADNP2    | chr18 | 77,929,015  | - | PAR6G    | N | Y | 59,517  |     |
| C01 | chr22 | 37,415,327  | + | TST      | chr22 | 37,420,695  | + | MPST     | N | Y | 5,368   |     |
| D01 | chr1  | 172,282,604 | + | DNM3     | chr1  | 172,291,753 | + | DNM3     | N | Y | 9,149   |     |
| D01 | chr2  | 173,302,495 | + | ITGA6    | chr2  | 173,304,472 | + | ITGA6    | N | Y | 1,977   |     |
| D01 | chr3  | 100,334,873 | - | GPR128   | chr3  | 100,446,152 | - | TFG      | N | Y | 111,279 |     |
| D01 | chr3  | 123,135,519 | + | ADCY5    | chr3  | 123,136,265 | + | ADCY5    | N | Y | 746     |     |
| D01 | chr5  | 129,020,376 | + | ADAMTS19 | chr5  | 129,024,195 | + | ADAMTS19 | N | Y | 3,819   |     |
| D01 | chr5  | 149,230,181 | - | PPARGC1B | chr5  | 149,270,199 | - | PDE6A    | N | Y | 40,018  |     |
| D01 | chr7  | 18,826,300  | + | HDAC9    | chr7  | 18,826,467  | + | HDAC9    | N | Y | 167     |     |
| D01 | chr8  | 57,048,719  | - |          | chr8  | 57,098,539  | - | PLAG1    | N | Y | 49,820  |     |
| D01 | chr9  | 113,667,553 | + | LPAR1    | chr9  | 113,669,264 | + | LPAR1    | N | Y | 1,711   |     |
| D01 | chr10 | 105,128,324 | + | TAF5     | chr10 | 105,133,114 | + | TAF5     | N | Y | 4,790   |     |
| D01 | chr14 | 47,672,012  | + | MDGA2    | chr14 | 47,678,230  | + | MDGA2    | N | Y | 6,218   |     |
| D01 | chr15 | 85,380,985  | - | ALPK3    | chr15 | 85,381,400  | + | ALPK3    | N | N | 415     |     |
| D01 | chr15 | 85,381,131  | + | ALPK3    | chr15 | 85,381,398  | - | ALPK3    | N | N | 267     |     |
| D01 | chr16 | 83,196,147  | + | CDH13    | chr16 | 83,209,726  | + | CDH13    | N | Y | 13,579  |     |
| D01 | chr17 | 44,887,353  | + | WNT3     | chr17 | 44,887,685  | + | WNT3     | N | Y | 332     |     |
| D01 | chr21 | 43,703,913  | + | ABCG1    | chr21 | 43,704,397  | + | ABCG1    | N | Y | 484     |     |
| D01 | chr22 | 46,924,695  | + | CELSR1   | chr22 | 46,925,569  | + | CELSR1   | N | Y | 874     |     |
| E01 | chr1  | 162,378,221 | + | SH2D1B   | chr1  | 162,378,877 | + | SH2D1B   | N | Y | 656     |     |
| E01 | chr2  | 32,201,502  | + | MEMO1    | chr2  | 32,203,192  | + | MEMO1    | N | Y | 1,690   |     |
| E01 | chr2  | 46,128,512  | + | PRKCE    | chr2  | 46,132,406  | + | PRKCE    | N | Y | 3,894   |     |
| E01 | chr2  | 206,246,836 | + | PARD3B   | chr2  | 206,255,783 | + | PARD3B   | N | Y | 8,947   |     |
| E01 | chr4  |             | - |          | chr6  |             | + | BACH2    | Y | N |         | yes |

|     |       |             |   |         |       |             |   |          |   |   |            |     |
|-----|-------|-------------|---|---------|-------|-------------|---|----------|---|---|------------|-----|
| E01 | chr4  | 6,635,439   | + |         | chr6  | 90,979,006  | - | BACH2    | Y | N |            | yes |
| E01 | chr4  | 6,635,748   | - |         | chr17 | 90,978,997  | - | CA10     | Y | Y |            | yes |
| E01 | chr5  | 128,964,985 | + | SEMA5A  | chr5  | 49,977,259  | + | SEMA5A   | N | Y |            |     |
| E01 | chr6  | 9,267,219   | - | BACH2   | chr17 | 9,275,423   | - | SLC39A11 | Y | Y | 8,204      | yes |
| E01 | chr7  | 90,979,006  | + | EXOC4   | chr7  | 70,860,680  | + | EXOC4    | N | Y |            |     |
| E01 | chr7  | 133,039,961 | + | PRKAG2  | chr7  | 133,040,558 | + | PRKAG2   | N | Y | 597        |     |
| E01 | chr9  | 151,552,174 | + | TBC1D13 | chr9  | 151,552,718 | + | TBC1D13  | N | Y | 544        |     |
| E01 | chr10 | 131,556,898 | + | TACC2   | chr10 | 131,557,883 | + | TACC2    | N | Y | 985        |     |
| E01 | chr12 | 123,827,180 | + |         | chr12 | 123,831,512 | + | TACC2    | N | Y | 4,332      |     |
| E01 | chr12 | 18,222,218  | - |         | chr12 | 18,234,138  | - | RERGL    | N | N | 11,920     |     |
| E01 | chr12 | 18,222,227  | - |         | chr12 | 18,234,192  | + | RERGL    | N | N | 11,965     |     |
| E01 | chr12 | 51,376,811  | + |         | chr12 | 51,380,334  | + | SLC11A2  | N | Y | 3,523      |     |
| E01 | chr12 | 53,595,988  | + | ITGB7   | chr12 | 53,596,590  | + | ITGB7    | N | Y | 602        |     |
| E01 | chr12 | 99,978,721  | + | ANKS1B  | chr12 | 99,982,702  | + | ANKS1B   | N | Y | 3,981      |     |
| E01 | chr16 | 4,067,093   | + | ADCY9   | chr16 | 4,067,573   | + | ADCY9    | N | Y | 480        |     |
| E01 | chr17 | 33,681,081  | + | SLFN11  | chr17 | 33,689,757  | + | SLFN11   | N | Y | 8,676      |     |
| E01 | chr17 | 33,687,392  | + | SLFN11  | chr17 | 33,689,759  | + | SLFN11   | N | Y | 2,367      |     |
| E01 | chr17 | 33,690,847  | + | SLFN11  | chr17 | 33,700,494  | + | SLFN11   | N | Y | 9,647      |     |
| E01 | chr17 | 71,562,137  | - | SDK2    | chr17 | 71,562,986  | + | SDK2     | N | N | 849        |     |
| E01 | chr18 | 24,134,023  | + | KCTD1   | chr18 | 24,134,444  | + | KCTD1    | N | Y | 421        |     |
| E01 | chrX  | 19,640,905  | - | SH3KBP1 | chrX  | 19,641,548  | - | SH3KBP1  | N | Y | 643        |     |
| E01 | chrX  | 32,931,076  | + | DMD     | chrX  | 32,931,604  | + | DMD      | N | Y | 528        |     |
| F01 | chr1  | 182,777,028 | + | NPL     | chr1  | 182,782,290 | + | NPL      | N | Y | 5,262      |     |
| F01 | chr2  | 28,720,813  | + | PLB1    | chr2  | 28,721,355  | + | PLB1     | N | Y | 542        |     |
| F01 | chr2  | 148,807,786 | + | MBD5    | chr2  | 148,813,762 | + | MBD5     | N | Y | 5,976      |     |
| F01 | chr3  | 61,827,238  | + | PTPRG   | chr3  | 61,837,175  | + | PTPRG    | N | Y | 9,937      |     |
| F01 | chr3  | 124,001,086 | - | KALRN   | chr18 | 75,652,754  | - |          | Y | Y |            | yes |
| F01 | chr3  | 173,240,733 | + | NLGN1   | chr3  | 173,241,712 | + | NLGN1    | N | Y | 979        |     |
| F01 | chr4  | 2,941,530   | - | NOP14   | chr12 | 16,970,231  | - |          | Y | Y |            | yes |
| F01 | chr4  | 2,941,851   | + | NOP14   | chr12 | 16,970,253  | + |          | Y | Y |            | yes |
| F01 | chr4  | 21,469,843  | - | KCNIP4  | chr4  | 110,248,224 | + |          | N | N | 88,778,381 | yes |

|     |       |             |   |        |       |             |   |          |   |   |            |     |
|-----|-------|-------------|---|--------|-------|-------------|---|----------|---|---|------------|-----|
| F01 | chr4  | 169,165,016 | - | DDX60  | chr7  | 116,808,601 | + | ST7      | Y | N |            | yes |
| F01 | chr4  | 189,013,485 | + | TRIML2 | chr4  | 189,015,126 | + | TRIML2   | N | Y | 1,641      |     |
| F01 | chr5  | 14,748,624  | + | ANKH   | chr5  | 14,750,271  | + | ANKH     | N | Y | 1,647      |     |
| F01 | chr5  | 14,749,156  | - | ANKH   | chr5  | 14,753,376  | + | ANKH     | N | N | 4,220      |     |
| F01 | chr5  | 14,749,156  | - | ANKH   | chr5  | 14,753,376  | + | ANKH     | N | N | 4,220      |     |
| F01 | chr5  | 14,749,513  | + | ANKH   | chr5  | 18,803,738  | + |          | N | Y | 4,054,225  | yes |
| F01 | chr5  | 14,749,546  | - | ANKH   | chr5  | 14,753,361  | - | ANKH     | N | Y | 3,815      |     |
| F01 | chr5  | 14,750,143  | + | ANKH   | chr13 | 106,513,997 | - |          | Y | N |            | yes |
| F01 | chr5  | 14,751,570  | - | ANKH   | chr5  | 14,751,898  | + | ANKH     | N | N | 328        |     |
| F01 | chr5  | 14,753,888  | + | ANKH   | chr5  | 14,753,923  | - | ANKH     | N | N | 35         |     |
| F01 | chr5  | 18,065,378  | - |        | chr5  | 41,921,426  | - | C5orf51  | N | Y | 23,856,048 | yes |
| F01 | chr5  | 18,861,724  | - |        | chr5  | 41,792,602  | - | OXCT1    | N | Y | 22,930,878 | yes |
| F01 | chr5  | 18,888,418  | + |        | chr5  | 41,071,123  | + | HEATR7B2 | N | Y | 22,182,705 | yes |
| F01 | chr5  | 28,352,392  | - |        | chr5  | 41,343,636  | + | PLCXD3   | N | N | 12,991,244 | yes |
| F01 | chr5  | 28,364,401  | + |        | chr5  | 41,831,861  | + | OXCT1    | N | Y | 13,467,460 | yes |
| F01 | chr5  | 28,649,138  | + |        | chr5  | 41,831,486  | - | OXCT1    | N | N | 13,182,348 | yes |
| F01 | chr5  | 41,198,129  | - | C6     | chr5  | 41,873,572  | + |          | N | N | 675,443    | yes |
| F01 | chr5  | 41,334,175  | + | PLCXD3 | chr5  | 41,826,701  | + | OXCT1    | N | Y | 492,526    |     |
| F01 | chr5  | 41,805,101  | + | OXCT1  | chr5  | 41,862,874  | - | OXCT1    | N | N | 57,773     |     |
| F01 | chr6  | 4,928,004   | + | CDYL   | chr6  | 4,928,621   | + | CDYL     | N | Y | 617        |     |
| F01 | chr7  | 4,299,796   | + | SDK1   | chr7  | 4,300,538   | + | SDK1     | N | Y | 742        |     |
| F01 | chr7  | 103,266,122 | + | RELN   | chr7  | 103,268,124 | + | RELN     | N | Y | 2,002      |     |
| F01 | chr7  | 114,045,855 | + | ZNF555 | chr8  | 73,139,003  | + |          | Y | Y |            | yes |
| F01 | chr8  | 97,792,198  | + | PGCP   | chr8  | 97,792,593  | + | PGCP     | N | Y | 395        |     |
| F01 | chr9  | 80,003,450  | + | VPS13A | chr9  | 80,007,848  | - | VPS13A   | N | N | 4,398      |     |
| F01 | chr9  | 80,003,452  | - | VPS13A | chr9  | 80,007,849  | + | VPS13A   | N | N | 4,397      |     |
| F01 | chr9  | 113,667,456 | - | LPAR1  | chr9  | 113,669,157 | - | LPAR1    | N | Y | 1,701      |     |
| F01 | chr9  | 113,667,553 | + | LPAR1  | chr9  | 113,669,264 | + | LPAR1    | N | Y | 1,711      |     |
| F01 | chr9  | 138,960,180 | + | NACC2  | chr9  | 138,963,225 | + | NACC2    | N | Y | 3,045      |     |
| F01 | chr10 | 58,789,805  | - |        | chr15 | 60,713,666  | + | NARG2    | Y | N |            | yes |
| F01 | chr10 |             | + |        | chr15 |             | - | NARG2    | Y | N |            | yes |

|     |       |             |   |         |       |             |   |         |   |   |            |     |
|-----|-------|-------------|---|---------|-------|-------------|---|---------|---|---|------------|-----|
| F01 | chr10 | 58,789,809  | + | BMPRI1A | chr10 | 60,713,908  | + | BMPRI1A | N | Y |            |     |
|     |       | 88,642,127  |   |         |       | 88,642,670  |   |         |   |   | 543        |     |
| F01 | chr11 | 108,026,918 | + |         | chr11 | 108,122,545 | + | ATM     | N | Y |            |     |
|     |       |             |   |         |       |             |   |         |   |   | 95,627     |     |
| F01 | chr12 | 32,330,618  | + | BICD1   | chr12 | 32,335,819  | + | BICD1   | N | Y |            |     |
|     |       |             |   |         |       |             |   |         |   |   | 5,201      |     |
| F01 | chr13 | 44,958,987  | + | SERP2   | chr13 | 106,470,584 | + |         | N | Y |            | yes |
|     |       |             |   |         |       |             |   |         |   |   | 61,511,597 |     |
| F01 | chr13 | 52,719,211  | - | NEK3    | chr13 | 107,935,687 | + | FAM155A | N | N |            | yes |
|     |       |             |   |         |       |             |   |         |   |   | 55,216,476 |     |
| F01 | chr13 | 93,965,435  | - | GPC6    | chr13 | 112,524,234 | - |         | N | Y |            | yes |
|     |       |             |   |         |       |             |   |         |   |   | 18,558,799 |     |
| F01 | chr15 | 40,102,355  | + | GPR176  | chr15 | 40,104,131  | + | GPR176  | N | Y |            |     |
|     |       |             |   |         |       |             |   |         |   |   | 1,776      |     |
| F01 | chr17 | 5,270,843   | + | RABEP1  | chr17 | 5,271,336   | + | RABEP1  | N | Y |            |     |
|     |       |             |   |         |       |             |   |         |   |   | 493        |     |
| F01 | chr17 | 31,632,861  | + | ACCN1   | chr17 | 31,636,171  | + | ACCN1   | N | Y |            |     |
|     |       |             |   |         |       |             |   |         |   |   | 3,310      |     |
| F01 | chr17 | 44,887,353  | + | WNT3    | chr17 | 44,887,685  | + | WNT3    | N | Y |            |     |
|     |       |             |   |         |       |             |   |         |   |   | 332        |     |
| F01 | chr17 | 46,400,405  | + | SKAP1   | chr17 | 46,402,558  | + | SKAP1   | N | Y |            |     |
|     |       |             |   |         |       |             |   |         |   |   | 2,153      |     |
| F01 | chr18 | 9,284,974   | + | ANKRD12 | chr18 | 9,286,141   | + |         | N | Y |            |     |
|     |       |             |   |         |       |             |   |         |   |   | 1,167      |     |
| F01 | chr19 | 4,291,820   | + |         | chr19 | 4,292,423   | + | TMIGD2  | N | Y |            |     |
|     |       |             |   |         |       |             |   |         |   |   | 603        |     |
| F01 | chr19 | 53,477,404  | + | ZNF702P | chr19 | 53,477,955  | + | ZNF702P | N | Y |            |     |
|     |       |             |   |         |       |             |   |         |   |   | 551        |     |
| F01 | chrX  | 17,061,042  | + | REPS2   | chrX  | 17,063,314  | + | REPS2   | N | Y |            |     |
|     |       |             |   |         |       |             |   |         |   |   | 2,272      |     |
| F01 | chrX  | 19,860,650  | + | SH3KBP1 | chrX  | 19,861,144  | - | SH3KBP1 | N | N |            |     |
|     |       |             |   |         |       |             |   |         |   |   | 494        |     |
| F01 | chrX  | 19,860,751  | - | SH3KBP1 | chrX  | 19,861,300  | + | SH3KBP1 | N | N |            |     |
|     |       |             |   |         |       |             |   |         |   |   | 549        |     |

Large structural alterations involving one or more genes in each of the six SMZL index genomes are shown. Left genes are arbitrarily designated based on chromosomal position numerically less than right genes (e.g., chr1 < chr2). Distance between intrachromosomal lesions is given in base pairs between breakpoints. Also indicated are the structural alterations that are displayed in the corresponding genome diagrams in Figure 1.



**Table S2.** Novel gene alterations in SMZL identified by DNA sequencing

| Chr  | Start      | Gene Symbol | Var | mRNA               | Protein            | Str | bp    | Ref | Call | aa    | ref | call | impact   | Gene | Alt | No |
|------|------------|-------------|-----|--------------------|--------------------|-----|-------|-----|------|-------|-----|------|----------|------|-----|----|
| chr1 | 1,391,191  | ATAD3C      | snp | NM_00103921<br>1.2 | NP_00103430<br>0.2 | +   | 1,454 | C   | T    | 153   | R   | C    | MISSENSE | A01  | 2   | 2  |
| chr1 | 1,392,531  | ATAD3C      | snp | NM_00103921<br>1.2 | NP_00103430<br>0.2 | +   | 1,707 | C   | T    | 237   | A   | V    | MISSENSE | C01  | 2   | 2  |
| chr1 | 16,386,440 | FAM131C     | snp | NM_182623.2        | NP_872429.2        | -   | 563   | C   | G    | 124   | G   | A    | MISSENSE | A01  | 2   | 2  |
| chr1 | 16,386,440 | FAM131C     | snp | NM_182623.2        | NP_872429.2        | -   | 563   | C   | G    | 124   | G   | A    | MISSENSE | F01  | 2   | 2  |
| chr1 | 24,434,518 | MYOM3       | snp | NM_152372.3        | NP_689585.3        | -   | 368   | G   | C    | 68    | A   | G    | MISSENSE | F01  | 1   | 2  |
| chr1 | 24,435,079 | MYOM3       | snp | NM_152372.3        | NP_689585.3        | -   | 209   | G   | A    | 15    | P   | L    | MISSENSE | C01  | 1   | 2  |
| chr1 | 25,880,438 | LDLRAP1     | snp | NM_015627.2        | NP_056442.2        | +   | 228   | C   | T    | 38    | R   | W    | MISSENSE | D01  | 2   | 2  |
| chr1 | 25,893,444 | LDLRAP1     | snp | NM_015627.2        | NP_056442.2        | +   | 1,002 | A   | G    | 296   | S   | G    | MISSENSE | A01  | 2   | 2  |
| chr1 | 27,684,749 | MAP3K6      | snp | NM_004672.3        | NP_004663.3        | -   | 3,085 | G   | A    | 945   | P   | L    | MISSENSE | B01  | 1   | 2  |
| chr1 | 27,687,677 | MAP3K6      | snp | NM_004672.3        | NP_004663.3        | -   | 2,050 | A   | G    | 600   | L   | P    | MISSENSE | E01  | 2   | 2  |
| chr1 | 32,201,438 | BAI2        | snp | NM_001703.2        | NP_001694.2        | -   | 3,609 | C   | T    | 1,085 | V   | I    | MISSENSE | D01  | 2   | 2  |
| chr1 | 32,201,438 | BAI2        | snp | NM_001703.2        | NP_001694.2        | -   | 3,609 | C   | T    | 1,085 | V   | I    | MISSENSE | E01  | 2   | 2  |
| chr1 | 32,673,513 | IQCC        | snp | NM_00116004<br>2.1 | NP_00115351<br>4.1 | +   | 1,518 | G   | C    | 490   | R   | T    | MISSENSE | D01  | 1   | 2  |
| chr1 | 32,673,513 | IQCC        | snp | NM_00116004<br>2.1 | NP_00115351<br>4.1 | +   | 1,518 | G   | C    | 490   | R   | T    | MISSENSE | E01  | 1   | 2  |
| chr1 | 39,798,518 | MACF1       | snp | NM_033044.2        | NP_149033.2        | +   | 1,709 | G   | C    | 526   | E   | Q    | MISSENSE | D01  | 1   | 2  |
| chr1 | 39,801,827 | MACF1       | snp | NM_033044.2        | NP_149033.2        | +   | 5,018 | A   | G    | 1,629 | T   | A    | MISSENSE | A01  | 2   | 2  |
| chr1 | 39,853,686 | MACF1       | snp | NM_012090.3        | NP_036222.3        | +   | 9,191 | T   | A    | 2,995 | V   | E    | MISSENSE | D01  | 1   | 2  |
| chr1 | 52,704,152 | ZFYVE9      | snp | NM_007323.1        | NP_015562.1        | +   | 1,235 | G   | A    | 354   | C   | Y    | MISSENSE | A01  | 1   | 2  |
| chr1 | 52,732,445 | ZFYVE9      | snp | NM_004799.2        | NP_004790.2        | +   | 2,569 | T   | G    | 799   | S   | A    | MISSENSE | A01  | 1   | 2  |

|          |                 |           |     |                    |                    |   |            |       |       |           |    |    |                |         |   |   |
|----------|-----------------|-----------|-----|--------------------|--------------------|---|------------|-------|-------|-----------|----|----|----------------|---------|---|---|
| ch<br>r1 | 52,800,41<br>6  | ZFYVE9    | snp | NM_004799.2        | NP_004790.2        | + | 3,81<br>8  | T     | G     | 1,21<br>5 | L  | R  | MISSENSE       | CO<br>1 | 1 | 2 |
| ch<br>r1 | 78,276,64<br>8  | LOC653631 | snp | XM_00311895<br>9.1 | XP_00311900<br>7.1 | - | 817        | A     | G     | 272       | I  | T  | MISSENSE       | FO<br>1 | 2 | 2 |
| ch<br>r1 | 78,277,38<br>0  | LOC653631 | del | XM_00311895<br>9.1 | XP_00311900<br>7.1 | - | 85         | A     |       | 28        | V  | G  | FRAMESHI<br>FT | AO<br>1 | 2 | 2 |
| ch<br>r1 | 78,277,43<br>5  | LOC653631 | snp | XM_00311895<br>9.1 | XP_00311900<br>7.1 | - | 30         | G     | A     | 10        | R  | C  | MISSENSE       | AO<br>1 | 1 | 2 |
| ch<br>r1 | 85,537,63<br>0  | WDR63     | snp | NM_145172.3        | NP_660155.2        | + | 197        | C     | G     | 2         | P  | A  | MISSENSE       | BO<br>1 | 2 | 2 |
| ch<br>r1 | 85,537,63<br>0  | WDR63     | snp | NM_145172.3        | NP_660155.2        | + | 197        | C     | G     | 2         | P  | A  | MISSENSE       | FO<br>1 | 2 | 2 |
| ch<br>r1 | 86,171,94<br>4  | ZNHIT6    | snp | NM_00117067<br>0.1 | NP_00116414<br>1.1 | - | 847        | C     | G     | 232       | M  | I  | MISSENSE       | DO<br>1 | 2 | 2 |
| ch<br>r1 | 86,173,77<br>3  | ZNHIT6    | snp | NM_00117067<br>0.1 | NP_00116414<br>1.1 | - | 342        | C     | A     | 64        | G  | V  | MISSENSE       | FO<br>1 | 1 | 2 |
| ch<br>r1 | 103,354,1<br>34 | COL11A1   | snp | NM_001854.3        | NP_001845.3        | - | 4,92<br>3  | G     | C     | 1,53<br>5 | P  | A  | MISSENSE       | FO<br>1 | 2 | 2 |
| ch<br>r1 | 103,354,4<br>71 | COL11A1   | snp | NM_001854.3        | NP_001845.3        | - | 4,78<br>5  | T     | C     | 1,48<br>9 | I  | V  | MISSENSE       | AO<br>1 | 1 | 2 |
| ch<br>r1 | 120,458,1<br>46 | NOTCH2    | snp | NM_024408.2        | NP_077719.2        | - | 7,45<br>3  | G     | A     | 2,39<br>9 | R  | *  | NONSENSE       | BO<br>1 | 1 | 3 |
| ch<br>r1 | 120,458,1<br>46 | NOTCH2    | snp | NM_024408.2        | NP_077719.2        | - | 7,45<br>3  | G     | A     | 2,39<br>9 | R  | *  | NONSENSE       | CO<br>1 | 1 | 3 |
| ch<br>r1 | 120,458,4<br>41 | NOTCH2    | ins | NM_024408.2        | NP_077719.2        | - | 7,15<br>9  |       | G     | 2,30<br>3 | I  | H  | FRAMESHI<br>FT | AO<br>1 | 2 | 3 |
| ch<br>r1 | 152,129,2<br>52 | RPTN      | snp | NM_00112296<br>5.1 | NP_00111643<br>7.1 | - | 386        | C     | T     | 107       | A  | T  | MISSENSE       | CO<br>1 | 2 | 2 |
| ch<br>r1 | 152,129,2<br>52 | RPTN      | snp | NM_00112296<br>5.1 | NP_00111643<br>7.1 | - | 386        | C     | T     | 107       | A  | T  | MISSENSE       | FO<br>1 | 2 | 2 |
| ch<br>r1 | 152,276,7<br>96 | FLG       | sub | NM_002016.1        | NP_002007.1        | - | 10,5<br>96 | CCGGA | ACTGC | 3,52<br>0 | SG | AV | MISSENSE       | DO<br>1 | 1 | 2 |
| ch<br>r1 | 152,277,1<br>27 | FLG       | snp | NM_002016.1        | NP_002007.1        | - | 10,2<br>69 | C     | T     | 3,41<br>1 | G  | R  | MISSENSE       | DO<br>1 | 2 | 2 |
| ch<br>r1 | 152,277,1<br>36 | FLG       | snp | NM_002016.1        | NP_002007.1        | - | 10,2<br>60 | G     | C     | 3,40<br>8 | R  | G  | MISSENSE       | DO<br>1 | 2 | 2 |
| ch<br>r1 | 152,277,1<br>48 | FLG       | sub | NM_002016.1        | NP_002007.1        | - | 10,2<br>48 | T     | GC    | 3,40<br>4 | T  | A  | FRAMESHI<br>FT | DO<br>1 | 2 | 2 |
| ch<br>r1 | 152,283,6<br>45 | FLG       | snp | NM_002016.1        | NP_002007.1        | - | 3,75<br>1  | T     | G     | 1,23<br>8 | E  | A  | MISSENSE       | AO<br>1 | 1 | 2 |
| ch<br>r1 | 158,607,8<br>63 | SPTA1     | snp | NM_003126.2        | NP_003117.2        | - | 5,34<br>6  | G     | T     | 1,71<br>5 | F  | L  | MISSENSE       | CO<br>1 | 2 | 2 |
| ch<br>r1 | 158,614,1<br>83 | SPTA1     | snp | NM_003126.2        | NP_003117.2        | - | 4,39<br>5  | C     | T     | 1,39<br>8 | M  | I  | MISSENSE       | BO<br>1 | 2 | 2 |

|      |             |        |     |                |                |   |        |     |   |       |   |   |            |     |   |   |
|------|-------------|--------|-----|----------------|----------------|---|--------|-----|---|-------|---|---|------------|-----|---|---|
| chr1 | 183,192,389 | LAMC2  | snp | NM_018891.2    | NP_061486.2    | + | 1,197  | G   | A | 294   | R | Q | MISSENSE   | CO1 | 1 | 2 |
| chr1 | 183,205,707 | LAMC2  | snp | NM_018891.2    | NP_061486.2    | + | 2,883  | G   | C | 856   | R | P | MISSENSE   | FO1 | 1 | 2 |
| chr1 | 190,067,734 | FAM5C  | snp | NM_199051.1    | NP_950252.1    | - | 1,945  | A   | C | 571   | Y | D | MISSENSE   | DO1 | 2 | 2 |
| chr1 | 190,423,815 | FAM5C  | snp | NM_199051.1    | NP_950252.1    | - | 436    | G   | A | 68    | Q | * | NONSENSE   | FO1 | 1 | 2 |
| chr1 | 207,133,092 | FCAMR  | snp | NM_001170631.1 | NP_001164102.1 | - | 2,003  | T   | C | 501   | T | A | MISSENSE   | FO1 | 1 | 2 |
| chr1 | 207,140,446 | FCAMR  | snp | NM_001170631.1 | NP_001164102.1 | - | 618    | C   | T | 39    | R | K | MISSENSE   | EO1 | 2 | 2 |
| chr1 | 211,526,768 | TRAF5  | snp | NM_004619.3    | NP_004610.1    | + | 247    | G   | A | 62    | R | H | MISSENSE   | AO1 | 1 | 2 |
| chr1 | 211,538,724 | TRAF5  | snp | NM_004619.3    | NP_004610.1    | + | 763    | G   | A | 234   | R | Q | MISSENSE   | DO1 | 1 | 2 |
| chr1 | 214,556,835 | PTPN14 | ins | NM_005401.4    | NP_005392.2    | - | 3,015  |     | G | 788   | I | H | FRAMESHIFT | AO1 | 2 | 2 |
| chr1 | 214,557,944 | PTPN14 | snp | NM_005401.4    | NP_005392.2    | - | 1,905  | C   | T | 417   | S | N | MISSENSE   | FO1 | 2 | 2 |
| chr1 | 215,901,703 | USH2A  | snp | NM_206933.2    | NP_996816.2    | - | 12,120 | C   | T | 3,911 | E | K | MISSENSE   | BO1 | 2 | 2 |
| chr1 | 215,916,662 | USH2A  | snp | NM_206933.2    | NP_996816.2    | - | 11,790 | C   | T | 3,801 | E | K | MISSENSE   | BO1 | 2 | 2 |
| chr1 | 216,172,287 | USH2A  | snp | NM_206933.2    | NP_996816.2    | - | 6,984  | A   | G | 2,199 | F | L | MISSENSE   | FO1 | 2 | 2 |
| chr1 | 225,380,397 | DNAH14 | snp | NM_001373.1    | NP_001364.1    | + | 5,819  | A   | G | 1,868 | I | V | MISSENSE   | AO1 | 2 | 2 |
| chr1 | 225,391,953 | DNAH14 | del | NM_001373.1    | NP_001364.1    | + | 6,104  | GTT |   | 1,963 | V |   | DELETE     | AO1 | 1 | 2 |
| chr1 | 225,428,344 | DNAH14 | ins | NM_001373.1    | NP_001364.1    | + | 6,717  |     | A | 2,167 | I | N | FRAMESHIFT | AO1 | 1 | 2 |
| chr1 | 225,569,093 | DNAH14 | snp | NM_001373.1    | NP_001364.1    | + | 12,798 | C   | T | 4,194 | P | L | MISSENSE   | AO1 | 2 | 2 |
| chr1 | 225,569,141 | DNAH14 | snp | NM_001373.1    | NP_001364.1    | + | 12,846 | G   | T | 4,210 | R | L | MISSENSE   | FO1 | 2 | 2 |
| chr1 | 228,400,210 | OBSCN  | snp | NM_052843.2    | NP_443075.2    | + | 770    | G   | C | 242   | G | R | MISSENSE   | EO1 | 1 | 3 |
| chr1 | 228,456,381 | OBSCN  | snp | NM_052843.2    | NP_443075.2    | + | 5,056  | A   | C | 1,670 | K | N | MISSENSE   | DO1 | 2 | 3 |
| chr1 | 228,471,311 | OBSCN  | snp | NM_052843.2    | NP_443075.2    | + | 8,889  | G   | A | 2,948 | R | H | MISSENSE   | AO1 | 1 | 3 |
| chr1 | 228,559,449 | OBSCN  | snp | NM_001098623.1 | NP_001092093.1 | + | 21,014 | G   | A | 6,990 | G | R | MISSENSE   | EO1 | 1 | 3 |

|    |           |           |     |             |             |   |      |    |    |      |   |   |          |    |   |   |
|----|-----------|-----------|-----|-------------|-------------|---|------|----|----|------|---|---|----------|----|---|---|
| ch | 234,556,4 | TARBP1    | snp | NM_005646.3 | NP_005637.3 | - | 3,54 | G  | C  | 1,18 | P | A | MISSENSE | B0 | 1 | 2 |
| r1 | 61        |           |     |             |             |   | 0    |    |    | 0    |   |   |          | 1  |   |   |
| ch | 234,565,8 | TARBP1    | snp | NM_005646.3 | NP_005637.3 | - | 2,58 | G  | A  | 862  | A | V | MISSENSE | C0 | 1 | 2 |
| r1 | 53        |           |     |             |             |   | 7    |    |    |      |   |   |          | 1  |   |   |
| ch | 237,054,4 | MTR       | snp | NM_000254.2 | NP_000245.2 | + | 3,44 | G  | C  | 1,00 | K | N | MISSENSE | C0 | 1 | 2 |
| r1 | 48        |           |     |             |             |   | 6    |    |    | 7    |   |   |          | 1  |   |   |
| ch | 237,058,6 | MTR       | snp | NM_000254.2 | NP_000245.2 | + | 3,85 | A  | G  | 1,14 | R | G | MISSENSE | A0 | 2 | 2 |
| r1 | 81        |           |     |             |             |   | 2    |    |    | 3    |   |   |          | 1  |   |   |
| ch | 237,754,2 | RYR2      | snp | NM_001035.2 | NP_001026.2 | + | 4,26 | C  | T  | 1,38 | R | C | MISSENSE | C0 | 2 | 3 |
| r1 | 78        |           |     |             |             |   | 6    |    |    | 2    |   |   |          | 1  |   |   |
| ch | 237,870,3 | RYR2      | snp | NM_001035.2 | NP_001026.2 | + | 9,81 | A  | G  | 3,23 | M | V | MISSENSE | F0 | 2 | 3 |
| r1 | 58        |           |     |             |             |   | 0    |    |    | 0    |   |   |          | 1  |   |   |
| ch | 237,880,4 | RYR2      | snp | NM_001035.2 | NP_001026.2 | + | 10,4 | C  | T  | 3,44 | A | V | MISSENSE | D0 | 2 | 3 |
| r1 | 98        |           |     |             |             |   | 44   |    |    | 1    |   |   |          | 1  |   |   |
| ch | 248,004,3 | OR11L1    | snp | NM_00100195 | NP_00100195 | - | 809  | G  | C  | 269  | I | M | MISSENSE | A0 | 1 | 2 |
| r1 | 88        |           |     | 9.1         | 9.1         |   |      |    |    |      |   |   |          | 1  |   |   |
| ch | 248,004,8 | OR11L1    | sub | NM_00100195 | NP_00100195 | - | 321  | CC | TT | 107  | G | N | MISSENSE | B0 | 2 | 2 |
| r1 | 75        |           |     | 9.1         | 9.1         |   |      |    |    |      |   |   |          | 1  |   |   |
| ch | 28,748,16 | PLB1      | snp | NM_153021.4 | NP_694566.4 | + | 318  | A  | G  | 91   | K | R | MISSENSE | B0 | 2 | 2 |
| r2 | 4         |           |     |             |             |   |      |    |    |      |   |   |          | 1  |   |   |
| ch | 28,805,35 | PLB1      | snp | NM_153021.4 | NP_694566.4 | + | 1,76 | A  | G  | 573  | R | G | MISSENSE | E0 | 2 | 2 |
| r2 | 8         |           |     |             |             |   | 3    |    |    |      |   |   |          | 1  |   |   |
| ch | 31,595,15 | XDH       | snp | NM_000379.3 | NP_000370.2 | - | 1,87 | C  | T  | 598  | R | H | MISSENSE | A0 | 2 | 2 |
| r2 | 3         |           |     |             |             |   | 4    |    |    |      |   |   |          | 1  |   |   |
| ch | 31,621,52 | XDH       | snp | NM_000379.3 | NP_000370.2 | - | 427  | T  | A  | 116  | T | S | MISSENSE | E0 | 1 | 2 |
| r2 | 2         |           |     |             |             |   |      |    |    |      |   |   |          | 1  |   |   |
| ch | 84,869,07 | DNAH6     | snp | NM_001370.1 | NP_001361.1 | + | 5,10 | T  | A  | 1,65 | S | T | MISSENSE | A0 | 1 | 2 |
| r2 | 1         |           |     |             |             |   | 8    |    |    | 7    |   |   |          | 1  |   |   |
| ch | 85,012,83 | DNAH6     | ins | NM_001370.1 | NP_001361.1 | + | 11,1 |    | A  | 3,68 | W | M | FRAMESHI | E0 | 1 | 2 |
| r2 | 2         |           |     |             |             |   | 89   |    |    | 4    |   |   | FT       | 1  |   |   |
| ch | 86,292,46 | POLR1A    | snp | NM_015425.3 | NP_056240.2 | - | 2,36 | T  | C  | 663  | K | R | MISSENSE | F0 | 1 | 2 |
| r2 | 3         |           |     |             |             |   | 9    |    |    |      |   |   |          | 1  |   |   |
| ch | 86,310,21 | POLR1A    | snp | NM_015425.3 | NP_056240.2 | - | 1,18 | T  | C  | 270  | N | D | MISSENSE | C0 | 1 | 2 |
| r2 | 0         |           |     |             |             |   | 9    |    |    |      |   |   |          | 1  |   |   |
| ch | 111,806,8 | ACOXL     | snp | NM_00114280 | NP_00113627 | + | 1,63 | T  | A  | 468  | C | * | NONSENSE | A0 | 1 | 2 |
| r2 | 31        |           |     | 7.1         | 9.1         |   | 0    |    |    |      |   |   |          | 1  |   |   |
| ch | 111,875,3 | ACOXL     | snp | NM_00114280 | NP_00113627 | + | 1,95 | G  | T  | 576  | G | * | NONSENSE | C0 | 2 | 2 |
| r2 | 78        |           |     | 7.1         | 9.1         |   | 2    |    |    |      |   |   |          | 1  |   |   |
| ch | 127,646,8 | LOC339760 | del | XM_295058.6 | XP_295058.6 | + | 86   | C  |    | 29   | P | Q | FRAMESHI | E0 | 1 | 2 |
| r2 | 58        |           |     |             |             |   |      |    |    |      |   |   | FT       | 1  |   |   |
| ch | 127,656,5 | LOC339760 | snp | XM_295058.6 | XP_295058.6 | + | 907  | G  | A  | 302  | R | H | MISSENSE | D0 | 1 | 2 |
| r2 | 52        |           |     |             |             |   |      |    |    |      |   |   |          | 1  |   |   |
| ch | 170,009,3 | LRP2      | snp | NM_004525.2 | NP_004516.2 | - | 12,5 | C  | T  | 4,12 | R | H | MISSENSE | A0 | 2 | 2 |
| r2 | 89        |           |     |             |             |   | 92   |    |    | 6    |   |   |          | 1  |   |   |



|    |           |        |     |             |             |   |      |     |    |      |    |    |          |    |   |   |  |  |  |
|----|-----------|--------|-----|-------------|-------------|---|------|-----|----|------|----|----|----------|----|---|---|--|--|--|
| ch | 14,552,97 |        |     |             |             |   |      |     |    |      |    |    |          |    |   |   |  |  |  |
| r3 | 1         | GRIP2  | snp | NM_00108042 | NP_00107389 | - | 2,02 | C   | T  | 675  | R  | Q  | MISSENSE | D0 | 2 | 3 |  |  |  |
|    |           |        |     | 3.2         | 2.2         |   | 6    |     |    |      |    |    |          | 1  |   |   |  |  |  |
| ch | 14,558,60 |        |     |             |             |   |      |     |    |      |    |    |          |    |   |   |  |  |  |
| r3 | 6         | GRIP2  | snp | NM_00108042 | NP_00107389 | - | 1,56 | C   | T  | 520  | R  | Q  | MISSENSE | F0 | 2 | 3 |  |  |  |
|    |           |        |     | 3.2         | 2.2         |   | 1    |     |    |      |    |    |          | 1  |   |   |  |  |  |
| ch | 14,581,78 |        |     |             |             |   |      |     |    |      |    |    |          |    |   |   |  |  |  |
| r3 | 9         | GRIP2  | snp | NM_00108042 | NP_00107389 | - | 316  | G   | A  | 105  | T  | I  | MISSENSE | C0 | 1 | 3 |  |  |  |
|    |           |        |     | 3.2         | 2.2         |   |      |     |    |      |    |    |          | 1  |   |   |  |  |  |
| ch | 28,476,60 |        |     |             |             |   |      |     |    |      |    |    |          |    |   |   |  |  |  |
| r3 | 3         | ZCWPW2 | snp | NM_00104043 | NP_00103552 | + | 477  | G   | C  | 111  | W  | C  | MISSENSE | F0 | 1 | 2 |  |  |  |
|    |           |        |     | 2.1         | 2.1         |   |      |     |    |      |    |    |          | 1  |   |   |  |  |  |
| ch | 28,566,12 |        |     |             |             |   |      |     |    |      |    |    |          |    |   |   |  |  |  |
| r3 | 5         | ZCWPW2 | snp | NM_00104043 | NP_00103552 | + | 1,15 | G   | A  | 339  | E  | K  | MISSENSE | D0 | 1 | 2 |  |  |  |
|    |           |        |     | 2.1         | 2.1         |   | 9    |     |    |      |    |    |          | 1  |   |   |  |  |  |
| ch | 41,831,23 |        |     |             |             |   |      |     |    |      |    |    |          |    |   |   |  |  |  |
| r3 | 2         | ULK4   | sub | NM_017886.2 | NP_060356.2 | - | 2,31 | TG  | AA | 703  | CK | C* | NONSENSE | D0 | 1 | 2 |  |  |  |
|    |           |        |     |             |             |   | 2    |     |    |      |    |    |          | 1  |   |   |  |  |  |
| ch | 41,949,34 |        |     |             |             |   |      |     |    |      |    |    |          |    |   |   |  |  |  |
| r3 | 7         | ULK4   | snp | NM_017886.2 | NP_060356.2 | - | 1,37 | G   | A  | 390  | P  | S  | MISSENSE | B0 | 1 | 2 |  |  |  |
|    |           |        |     |             |             |   | 1    |     |    |      |    |    |          | 1  |   |   |  |  |  |
| ch | 45,972,66 |        |     |             |             |   |      |     |    |      |    |    |          |    |   |   |  |  |  |
| r3 | 2         | FYCO1  | snp | NM_024513.2 | NP_078789.2 | - | 4,35 | G   | C  | 1,38 | A  | G  | MISSENSE | B0 | 1 | 2 |  |  |  |
|    |           |        |     |             |             |   | 6    |     |    | 3    |    |    |          | 1  |   |   |  |  |  |
| ch | 46,008,47 |        |     |             |             |   |      |     |    |      |    |    |          |    |   |   |  |  |  |
| r3 | 9         | FYCO1  | snp | NM_024513.2 | NP_078789.2 | - | 2,55 | C   | G  | 781  | Q  | H  | MISSENSE | D0 | 2 | 2 |  |  |  |
|    |           |        |     |             |             |   | 1    |     |    |      |    |    |          | 1  |   |   |  |  |  |
| ch | 47,038,81 |        |     |             |             |   |      |     |    |      |    |    |          |    |   |   |  |  |  |
| r3 | 1         | NBEAL2 | snp | NM_015175.1 | NP_055990.1 | + | 2,89 | C   | T  | 904  | Q  | *  | NONSENSE | E0 | 2 | 2 |  |  |  |
|    |           |        |     |             |             |   | 1    |     |    |      |    |    |          | 1  |   |   |  |  |  |
| ch | 47,049,61 |        |     |             |             |   |      |     |    |      |    |    |          |    |   |   |  |  |  |
| r3 | 4         | NBEAL2 | snp | NM_015175.1 | NP_055990.1 | + | 7,83 | G   | A  | 2,55 | G  | E  | MISSENSE | D0 | 1 | 2 |  |  |  |
|    |           |        |     |             |             |   | 6    |     |    | 2    |    |    |          | 1  |   |   |  |  |  |
| ch | 47,447,41 |        |     |             |             |   |      |     |    |      |    |    |          |    |   |   |  |  |  |
| r3 | 3         | PTPN23 | snp | NM_015466.2 | NP_056281.1 | + | 519  | G   | T  | 141  | V  | F  | MISSENSE | C0 | 2 | 2 |  |  |  |
|    |           |        |     |             |             |   |      |     |    |      |    |    |          | 1  |   |   |  |  |  |
| ch | 47,453,37 |        |     |             |             |   |      |     |    |      |    |    |          |    |   |   |  |  |  |
| r3 | 1         | PTPN23 | snp | NM_015466.2 | NP_056281.1 | + | 4,08 | G   | A  | 1,32 | V  | M  | MISSENSE | C0 | 1 | 2 |  |  |  |
|    |           |        |     |             |             |   | 3    |     |    | 9    |    |    |          | 1  |   |   |  |  |  |
| ch | 47,454,41 |        |     |             |             |   |      |     |    |      |    |    |          |    |   |   |  |  |  |
| r3 | 8         | PTPN23 | snp | NM_015466.2 | NP_056281.1 | + | 4,75 | T   | C  | 1,55 | L  | P  | MISSENSE | E0 | 1 | 2 |  |  |  |
|    |           |        |     |             |             |   | 0    |     |    | 1    |    |    |          | 1  |   |   |  |  |  |
| ch | 49,200,65 |        |     |             |             |   |      |     |    |      |    |    |          |    |   |   |  |  |  |
| r3 | 8         | CCDC71 | snp | NM_022903.3 | NP_075054.3 | - | 1,12 | T   | A  | 327  | Q  | L  | MISSENSE | D0 | 2 | 2 |  |  |  |
|    |           |        |     |             |             |   | 0    |     |    |      |    |    |          | 1  |   |   |  |  |  |
| ch | 49,201,32 |        |     |             |             |   |      |     |    |      |    |    |          |    |   |   |  |  |  |
| r3 | 2         | CCDC71 | snp | NM_022903.3 | NP_075054.3 | - | 456  | T   | C  | 106  | M  | V  | MISSENSE | A0 | 1 | 2 |  |  |  |
|    |           |        |     |             |             |   |      |     |    |      |    |    |          | 1  |   |   |  |  |  |
| ch | 97,887,84 |        |     |             |             |   |      |     |    |      |    |    |          |    |   |   |  |  |  |
| r3 | 9         | OR5H15 | del | NM_00100551 | NP_00100551 | + | 306  | T   |    | 102  | S  | P  | FRAMESHI | C0 | 1 | 2 |  |  |  |
|    |           |        |     | 5.1         | 5.1         |   |      |     |    |      |    |    | FT       | 1  |   |   |  |  |  |
| ch | 97,887,96 |        |     |             |             |   |      |     |    |      |    |    |          |    |   |   |  |  |  |
| r3 | 9         | OR5H15 | snp | NM_00100551 | NP_00100551 | + | 426  | C   | T  | 142  | R  | W  | MISSENSE | D0 | 2 | 2 |  |  |  |
|    |           |        |     | 5.1         | 5.1         |   |      |     |    |      |    |    |          | 1  |   |   |  |  |  |
| ch | 121,415,7 |        |     |             |             |   |      |     |    |      |    |    |          |    |   |   |  |  |  |
| r3 | 13        | GOLGB1 | snp | NM_004487.3 | NP_004478.3 | - | 3,76 | C   | G  | 1,21 | R  | P  | MISSENSE | B0 | 2 | 2 |  |  |  |
|    |           |        |     |             |             |   | 6    |     |    | 3    |    |    |          | 1  |   |   |  |  |  |
| ch | 121,417,2 |        |     |             |             |   |      |     |    |      |    |    |          |    |   |   |  |  |  |
| r3 | 32        | GOLGB1 | sub | NM_004487.3 | NP_004478.3 | - | 2,24 | CAT | TC | 706  | YE | *  | NONSENSE | D0 | 2 | 2 |  |  |  |
|    |           |        |     |             |             |   | 5    |     |    |      |    |    |          | 1  |   |   |  |  |  |
| ch | 142,083,9 |        |     |             |             |   |      |     |    |      |    |    |          |    |   |   |  |  |  |
| r3 | 77        | XRN1   | snp | NM_019001.3 | NP_061874.3 | - | 3,37 | T   | C  | 1,10 | E  | G  | MISSENSE | A0 | 1 | 2 |  |  |  |
|    |           |        |     |             |             |   | 1    |     |    | 1    |    |    |          | 1  |   |   |  |  |  |
| ch | 142,095,3 |        |     |             |             |   |      |     |    |      |    |    |          |    |   |   |  |  |  |
| r3 | 87        | XRN1   | snp | NM_019001.3 | NP_061874.3 | - | 2,83 | C   | T  | 921  | G  | R  | MISSENSE | B0 | 2 | 2 |  |  |  |
|    |           |        |     |             |             |   | 0    |     |    |      |    |    |          | 1  |   |   |  |  |  |

|      |             |              |     |                |                |   |       |        |   |       |    |   |          |     |   |   |
|------|-------------|--------------|-----|----------------|----------------|---|-------|--------|---|-------|----|---|----------|-----|---|---|
| chr3 | 150,282,123 | EIF2A        | snp | NM_032025.3    | NP_114414.2    | + | 446   | G      | A | 143   | R  | H | MISSENSE | A01 | 1 | 3 |
| chr3 | 150,289,789 | EIF2A        | snp | NM_032025.3    | NP_114414.2    | + | 872   | C      | G | 285   | T  | S | MISSENSE | F01 | 2 | 3 |
| chr3 | 150,301,670 | EIF2A        | del | NM_032025.3    | NP_114414.2    | + | 1,746 | GCTGGA |   | 576   | EL |   | DELETE   | E01 | 1 | 3 |
| chr3 | 156,396,122 | TIPARP       | snp | NM_015508.4    | NP_056323.2    | + | 1,058 | G      | A | 212   | D  | N | MISSENSE | B01 | 1 | 2 |
| chr3 | 156,422,509 | TIPARP       | snp | NM_015508.4    | NP_056323.2    | + | 1,985 | G      | A | 521   | D  | N | MISSENSE | A01 | 1 | 2 |
| chr3 | 193,185,127 | ATP13A4      | snp | NM_032279.2    | NP_115655.2    | - | 1,198 | A      | G | 363   | V  | A | MISSENSE | F01 | 2 | 2 |
| chr3 | 193,210,748 | ATP13A4      | snp | NM_032279.2    | NP_115655.2    | - | 597   | G      | T | 163   | Q  | K | MISSENSE | C01 | 2 | 2 |
| chr4 | 37,446,526  | KIAA1239     | snp | NM_001144990.1 | NP_001138462.1 | + | 2,916 | A      | T | 972   | I  | F | MISSENSE | D01 | 2 | 2 |
| chr4 | 37,448,155  | KIAA1239     | snp | NM_001144990.1 | NP_001138462.1 | + | 4,545 | C      | T | 1,515 | R  | C | MISSENSE | C01 | 2 | 2 |
| chr4 | 77,661,568  | SHROOM3      | snp | NM_020859.3    | NP_065910.3    | + | 3,195 | C      | T | 747   | P  | L | MISSENSE | E01 | 2 | 2 |
| chr4 | 77,662,360  | SHROOM3      | snp | NM_020859.3    | NP_065910.3    | + | 3,987 | C      | A | 1,011 | T  | N | MISSENSE | B01 | 1 | 2 |
| chr4 | 90,171,112  | GPRIN3       | snp | NM_198281.2    | NP_938022.2    | - | 667   | G      | A | 49    | A  | V | MISSENSE | E01 | 1 | 2 |
| chr4 | 90,171,112  | GPRIN3       | snp | NM_198281.2    | NP_938022.2    | - | 667   | G      | A | 49    | A  | V | MISSENSE | F01 | 1 | 2 |
| chr4 | 93,225,867  | GRID2        | snp | NM_001510.2    | NP_001501.2    | + | 318   | G      | A | 20    | A  | T | MISSENSE | B01 | 1 | 2 |
| chr4 | 94,138,009  | GRID2        | snp | NM_001510.2    | NP_001501.2    | + | 1,168 | G      | A | 303   | R  | Q | MISSENSE | D01 | 1 | 2 |
| chr4 | 94,411,796  | GRID2        | snp | NM_001510.2    | NP_001501.2    | + | 2,123 | A      | T | 621   | E  | D | MISSENSE | D01 | 2 | 2 |
| chr4 | 120,327,472 | LOC100128460 | snp | XM_003118836.1 | XP_003118884.1 | - | 1,495 | G      | T | 498   | A  | D | MISSENSE | B01 | 2 | 2 |
| chr4 | 120,327,752 | LOC100128460 | snp | XM_003118836.1 | XP_003118884.1 | - | 1,215 | C      | T | 405   | G  | S | MISSENSE | B01 | 2 | 2 |
| chr4 | 120,327,982 | LOC100128460 | snp | XM_003118836.1 | XP_003118884.1 | - | 985   | G      | A | 328   | P  | L | MISSENSE | A01 | 1 | 2 |
| chr5 | 13,900,378  | DNAH5        | snp | NM_001369.2    | NP_001360.1    | - | 2,236 | G      | A | 731   | S  | F | MISSENSE | F01 | 1 | 3 |
| chr5 | 13,902,244  | DNAH5        | snp | NM_001369.2    | NP_001360.1    | - | 1,688 | G      | C | 548   | N  | K | MISSENSE | A01 | 2 | 3 |
| chr5 | 13,922,301  | DNAH5        | snp | NM_001369.2    | NP_001360.1    | - | 615   | C      | T | 191   | A  | T | MISSENSE | B01 | 2 | 3 |

|      |             |         |     |                |                |   |        |                                  |          |       |          |     |            |     |   |   |
|------|-------------|---------|-----|----------------|----------------|---|--------|----------------------------------|----------|-------|----------|-----|------------|-----|---|---|
| chr5 | 23,524,515  | PRDM9   | snp | NM_020227.2    | NP_064612.2    | + | 1,205  | A                                | G        | 341   | R        | G   | MISSENSE   | B01 | 2 | 2 |
| chr5 | 23,526,914  | PRDM9   | snp | NM_020227.2    | NP_064612.2    | + | 1,899  | T                                | G        | 572   | I        | R   | MISSENSE   | E01 | 1 | 2 |
| chr5 | 64,976,538  | SGTB    | snp | NM_019072.2    | NP_061945.1    | - | 781    | A                                | T        | 187   | S        | T   | MISSENSE   | B01 | 2 | 2 |
| chr5 | 64,976,538  | SGTB    | snp | NM_019072.2    | NP_061945.1    | - | 781    | A                                | T        | 187   | S        | T   | MISSENSE   | F01 | 2 | 2 |
| chr5 | 79,028,011  | CMYA5   | ins | NM_153610.3    | NP_705838.3    | + | 3,495  |                                  | AAAGGGAG | 1,141 | ASS      | KGR | FRAMESHIFT | C01 | 1 | 2 |
| chr5 | 79,033,120  | CMYA5   | snp | NM_153610.3    | NP_705838.3    | + | 8,604  | A                                | G        | 2,844 | R        | G   | MISSENSE   | A01 | 2 | 2 |
| chr5 | 90,025,479  | GPR98   | snp | NM_032119.3    | NP_115495.3    | + | 10,543 | T                                | G        | 3,482 | I        | S   | MISSENSE   | B01 | 1 | 3 |
| chr5 | 90,074,707  | GPR98   | snp | NM_032119.3    | NP_115495.3    | + | 12,971 | T                                | G        | 4,291 | S        | R   | MISSENSE   | E01 | 2 | 3 |
| chr5 | 90,151,697  | GPR98   | snp | NM_032119.3    | NP_115495.3    | + | 17,830 | C                                | G        | 5,911 | S        | C   | MISSENSE   | A01 | 2 | 3 |
| chr5 | 135,286,953 | LECT2   | snp | NM_002302.2    | NP_002293.2    | - | 447    | T                                | C        | 82    | N        | D   | MISSENSE   | C01 | 1 | 2 |
| chr5 | 135,290,476 | LECT2   | snp | NM_002302.2    | NP_002293.2    | - | 246    | C                                | T        | 15    | A        | T   | MISSENSE   | E01 | 2 | 2 |
| chr5 | 140,579,737 | PCDHB11 | ins | NM_018931.2    | NP_061754.1    | + | 390    |                                  | T        | 130   | P        | S   | FRAMESHIFT | C01 | 2 | 2 |
| chr5 | 140,581,711 | PCDHB11 | snp | NM_018931.2    | NP_061754.1    | + | 2,364  | T                                | C        | 788   | F        | L   | MISSENSE   | F01 | 1 | 2 |
| chr5 | 140,769,005 | PCDHGB4 | snp | NM_032098.1    | NP_115269.1    | + | 1,554  | G                                | T        | 518   | D        | Y   | MISSENSE   | C01 | 2 | 2 |
| chr5 | 140,769,007 | PCDHGB4 | del | NM_032098.1    | NP_115269.1    | + | 1,556  | CCACGAGC<br>AGCTGCGC<br>GCCTTCGA |          | 518   | DHEQLRAF |     | DELETE     | A01 | 1 | 2 |
| chr5 | 140,778,759 | PCDHGB5 | snp | NM_032099.1    | NP_115270.1    | + | 1,065  | G                                | A        | 355   | A        | T   | MISSENSE   | F01 | 1 | 2 |
| chr5 | 140,779,717 | PCDHGB5 | snp | NM_032099.1    | NP_115270.1    | + | 2,023  | C                                | G        | 674   | P        | R   | MISSENSE   | A01 | 2 | 2 |
| chr5 | 140,864,783 | PCDHGC4 | snp | NM_032406.1    | NP_115782.1    | + | 43     | C                                | T        | 14    | A        | V   | MISSENSE   | F01 | 2 | 2 |
| chr5 | 140,866,831 | PCDHGC4 | snp | NM_032406.1    | NP_115782.1    | + | 2,091  | G                                | C        | 697   | V        | L   | MISSENSE   | B01 | 1 | 2 |
| chr5 | 147,494,000 | SPINK5  | snp | NM_001127699.1 | NP_001121171.1 | + | 2,036  | G                                | A        | 654   | G        | D   | MISSENSE   | D01 | 1 | 2 |
| chr5 | 147,513,363 | SPINK5  | snp | NM_006846.3    | NP_006837.2    | + | 3,172  | C                                | T        | 1,033 | R        | C   | MISSENSE   | B01 | 2 | 2 |
| chr5 | 149,447,8   | CSF1R   | sub | NM_005211.3    | NP_005202.2    | - | 1,88   | CAGGA                            | AGCAG    | 532   | LL       | PA  | MISSENSE   | D01 | 1 | 3 |



|    |           |           |     |             |             |   |      |    |            |      |    |         |          |    |   |   |
|----|-----------|-----------|-----|-------------|-------------|---|------|----|------------|------|----|---------|----------|----|---|---|
| r5 | 01        |           |     |             |             |   | 9    |    |            |      |    |         |          |    |   | 1 |
| ch | 149,460,3 | CSF1R     | snp | NM_005211.3 | NP_005202.2 | - | 590  | T  | C          | 99   | Y  | C       | MISSENSE | B0 | 1 | 3 |
| r5 | 37        |           |     |             |             |   |      |    |            |      |    |         |          | 1  |   |   |
| ch | 149,460,5 | CSF1R     | snp | NM_005211.3 | NP_005202.2 | - | 386  | A  | C          | 31   | V  | G       | MISSENSE | C0 | 2 | 3 |
| r5 | 41        |           |     |             |             |   |      |    |            |      |    |         |          | 1  |   |   |
| ch | 149,754,2 | TCOF1     | snp | NM_00100865 | NP_00100865 | + | 1,23 | C  | T          | 376  | P  | L       | MISSENSE | A0 | 2 | 2 |
| r5 | 25        |           |     | 7.2         | 7.1         |   | 7    |    |            |      |    |         |          | 1  |   |   |
| ch | 149,754,7 | TCOF1     | snp | NM_00100865 | NP_00100865 | + | 1,58 | A  | G          | 491  | M  | V       | MISSENSE | B0 | 2 | 2 |
| r5 | 11        |           |     | 7.2         | 7.1         |   | 1    |    |            |      |    |         |          | 1  |   |   |
| ch | 150,422,2 | TNIP1     | snp | NM_006058.3 | NP_006049.3 | - | 1,59 | G  | A          | 335  | T  | I       | MISSENSE | D0 | 1 | 2 |
| r5 | 27        |           |     |             |             |   | 5    |    |            |      |    |         |          | 1  |   |   |
| ch | 150,436,3 | TNIP1     | snp | NM_006058.3 | NP_006049.3 | - | 1,21 | G  | C          | 207  | L  | V       | MISSENSE | A0 | 1 | 2 |
| r5 | 31        |           |     |             |             |   | 0    |    |            |      |    |         |          | 1  |   |   |
| ch | 176,815,1 | SLC34A1   | sub | NM_00116757 | NP_00116105 | + | 883  | CC | GG         | 259  | GR | GG      | MISSENSE | E0 | 1 | 2 |
| r5 | 29        |           |     | 9.1         | 1.1         |   |      |    |            |      |    |         |          | 1  |   |   |
| ch | 176,816,7 | SLC34A1   | del | NM_00116757 | NP_00116105 | + | 1,11 | C  |            | 336  | P  | L       | FRAMESHI | A0 | 2 | 2 |
| r5 | 12        |           |     | 9.1         | 1.1         |   | 3    |    |            |      |    |         | FT       | 1  |   |   |
| ch | 4,068,949 | C6orf146  | snp | NM_173563.1 | NP_775834.1 | - | 1,84 | A  | G          | 502  | S  | P       | MISSENSE | E0 | 2 | 2 |
| r6 |           |           |     |             |             |   | 6    |    |            |      |    |         |          | 1  |   |   |
| ch | 4,077,618 | C6orf146  | snp | NM_173563.1 | NP_775834.1 | - | 369  | G  | C          | 9    | N  | K       | MISSENSE | A0 | 1 | 2 |
| r6 |           |           |     |             |             |   |      |    |            |      |    |         |          | 1  |   |   |
| ch | 7,232,011 | RREB1     | snp | NM_00116834 | NP_00116181 | + | 4,13 | C  | T          | 1,22 | P  | L       | MISSENSE | A0 | 2 | 2 |
| r6 |           |           |     | 4.1         | 6.1         |   | 5    |    |            |      |    |         |          | 1  |   |   |
| ch | 7,247,037 | RREB1     | snp | NM_00116834 | NP_00116181 | + | 4,64 | C  | T          | 1,39 | T  | I       | MISSENSE | D0 | 2 | 2 |
| r6 |           |           |     | 4.1         | 6.1         |   | 5    |    |            | 6    |    |         |          | 1  |   |   |
| ch | 7,576,579 | DSP       | snp | NM_00100884 | NP_00100884 | + | 2,96 | A  | G          | 894  | Y  | C       | MISSENSE | A0 | 2 | 2 |
| r6 |           |           |     | 4.1         | 4.1         |   | 2    |    |            |      |    |         |          | 1  |   |   |
| ch | 7,581,647 | DSP       | snp | NM_004415.2 | NP_004406.2 | + | 5,50 | A  | C          | 1,74 | D  | A       | MISSENSE | E0 | 2 | 2 |
| r6 |           |           |     |             |             |   | 3    |    |            | 1    |    |         |          | 1  |   |   |
| ch | 38,840,91 | DNAH8     | snp | NM_001371.2 | NP_001362.2 | + | 7,41 | A  | G          | 2,27 | I  | V       | MISSENSE | A0 | 2 | 2 |
| r6 | 4         |           |     |             |             |   | 9    |    |            | 3    |    |         |          | 1  |   |   |
| ch | 38,917,23 | DNAH8     | snp | NM_001371.2 | NP_001362.2 | + | 12,0 | T  | A          | 3,82 | S  | T       | MISSENSE | A0 | 1 | 2 |
| r6 | 0         |           |     |             |             |   | 81   |    |            | 7    |    |         |          | 1  |   |   |
| ch | 38,998,10 | DNAH8     | snp | NM_001371.2 | NP_001362.2 | + | 14,0 | C  | T          | 4,46 | R  | *       | NONSENSE | E0 | 2 | 2 |
| r6 | 2         |           |     |             |             |   | 07   |    |            | 9    |    |         |          | 1  |   |   |
| ch | 44,442,03 | LOC100128 | snp | XM_00172573 | XP_00172578 | + | 244  | T  | G          | 81   | V  | G       | MISSENSE | B0 | 1 | 2 |
| r6 | 2         | 935       |     | 5.1         | 7.1         |   |      |    |            |      |    |         |          | 1  |   |   |
| ch | 44,442,04 | LOC100128 | snp | XM_00172573 | XP_00172578 | + | 252  | A  | G          | 84   | R  | G       | MISSENSE | B0 | 1 | 2 |
| r6 | 0         | 935       |     | 5.1         | 7.1         |   |      |    |            |      |    |         |          | 1  |   |   |
| ch | 44,442,04 | LOC100128 | ins | XM_00172573 | XP_00172578 | + | 256  |    | TGGTGGCAGA | 90   |    | GVRGLVA | INSERT   | C0 | 2 | 2 |
| r6 | 4         | 935       |     | 5.1         | 7.1         |   |      |    | TCCTGGGGTC |      |    | DP      |          | 1  |   |   |
|    |           |           |     |             |             |   |      |    | AGAGGGC    |      |    |         |          |    |   |   |

|          |                 |         |     |                    |                    |   |            |      |      |           |    |    |                |         |   |   |
|----------|-----------------|---------|-----|--------------------|--------------------|---|------------|------|------|-----------|----|----|----------------|---------|---|---|
| ch<br>r6 | 56,480,49<br>9  | DST     | snp | NM_001723.5        | NP_001714.1        | - | 7,87<br>2  | T    | C    | 2,58<br>8 | I  | V  | MISSENSE       | C0<br>1 | 1 | 3 |
| ch<br>r6 | 56,480,49<br>9  | DST     | snp | NM_001723.5        | NP_001714.1        | - | 7,87<br>2  | T    | C    | 2,58<br>8 | I  | V  | MISSENSE       | F0<br>1 | 1 | 3 |
| ch<br>r6 | 56,482,92<br>2  | DST     | snp | NM_001723.5        | NP_001714.1        | - | 6,01<br>6  | A    | G    | 1,96<br>9 | F  | S  | MISSENSE       | D0<br>1 | 2 | 3 |
| ch<br>r6 | 64,694,36<br>9  | EYS     | snp | NM_00114280<br>0.1 | NP_00113627<br>2.1 | - | 7,49<br>8  | T    | G    | 2,32<br>0 | I  | L  | MISSENSE       | A0<br>1 | 2 | 2 |
| ch<br>r6 | 65,300,47<br>6  | EYS     | snp | NM_00114280<br>0.1 | NP_00113627<br>2.1 | - | 5,82<br>0  | A    | T    | 1,76<br>0 | Y  | *  | NONSENSE       | E0<br>1 | 2 | 2 |
| ch<br>r6 | 90,380,73<br>2  | MDN1    | snp | NM_014611.1        | NP_055426.1        | - | 13,9<br>76 | C    | T    | 4,62<br>0 | V  | I  | MISSENSE       | F0<br>1 | 2 | 3 |
| ch<br>r6 | 90,384,23<br>3  | MDN1    | ins | NM_014611.1        | NP_055426.1        | - | 12,9<br>52 |      | G    | 4,27<br>8 | PQ | PS | FRAMESHI<br>FT | A0<br>1 | 2 | 3 |
| ch<br>r6 | 90,411,75<br>7  | MDN1    | snp | NM_014611.1        | NP_055426.1        | - | 8,28<br>6  | C    | T    | 2,72<br>3 | R  | Q  | MISSENSE       | B0<br>1 | 2 | 3 |
| ch<br>r6 | 99,848,77<br>7  | SFRS18  | snp | NM_032870.2        | NP_116259.2        | - | 2,28<br>3  | G    | A    | 685       | R  | C  | MISSENSE       | B0<br>1 | 1 | 2 |
| ch<br>r6 | 99,848,77<br>7  | SFRS18  | snp | NM_032870.2        | NP_116259.2        | - | 2,28<br>3  | G    | A    | 685       | R  | C  | MISSENSE       | F0<br>1 | 1 | 2 |
| ch<br>r6 | 112,450,1<br>55 | LAMA4   | snp | NM_00110520<br>6.1 | NP_00109867<br>6.1 | - | 4,56<br>3  | A    | C    | 1,41<br>8 | L  | V  | MISSENSE       | C0<br>1 | 2 | 2 |
| ch<br>r6 | 112,486,3<br>96 | LAMA4   | snp | NM_00110520<br>6.1 | NP_00109867<br>6.1 | - | 1,94<br>1  | G    | A    | 544       | R  | C  | MISSENSE       | F0<br>1 | 1 | 2 |
| ch<br>r6 | 152,501,4<br>15 | SYNE1   | snp | NM_015293.2        | NP_056108.2        | - | 7,00<br>6  | C    | T    | 2,29<br>5 | R  | Q  | MISSENSE       | F0<br>1 | 2 | 2 |
| ch<br>r6 | 152,806,1<br>03 | SYNE1   | del | NM_033071.2        | NP_149062.1        | - | 1,50<br>8  | A    |      | 357       | FK | LS | FRAMESHI<br>FT | C0<br>1 | 2 | 2 |
| ch<br>r6 | 155,465,7<br>76 | TIAM2   | snp | NM_012454.3        | NP_036586.2        | + | 1,87<br>5  | T    | A    | 555       | N  | K  | MISSENSE       | B0<br>1 | 1 | 2 |
| ch<br>r6 | 155,577,7<br>13 | TIAM2   | sub | NM_012454.3        | NP_036586.2        | + | 4,77<br>2  | GCTT | CCCA | 1,52<br>1 | SL | TQ | MISSENSE       | C0<br>1 | 1 | 2 |
| ch<br>r6 | 170,169,7<br>37 | C6orf70 | snp | NM_018341.1        | NP_060811.1        | + | 1,19<br>4  | A    | G    | 387       | N  | D  | MISSENSE       | D0<br>1 | 2 | 2 |
| ch<br>r6 | 170,176,1<br>20 | C6orf70 | snp | NM_018341.1        | NP_060811.1        | + | 1,51<br>2  | C    | G    | 493       | R  | G  | MISSENSE       | E0<br>1 | 2 | 2 |
| ch<br>r7 | 30,818,14<br>1  | FAM188B | snp | NM_032222.2        | NP_115598.2        | + | 234        | T    | G    | 52        | L  | R  | MISSENSE       | D0<br>1 | 2 | 2 |
| ch<br>r7 | 30,868,29<br>8  | FAM188B | snp | NM_032222.2        | NP_115598.2        | + | 1,15<br>4  | A    | G    | 359       | N  | D  | MISSENSE       | B0<br>1 | 2 | 2 |
| ch<br>r7 | 47,840,30<br>9  | PKD1L1  | snp | NM_138295.2        | NP_612152.1        | - | 8,12<br>9  | C    | G    | 2,70<br>9 | Q  | H  | MISSENSE       | D0<br>1 | 2 | 3 |
| ch<br>r7 | 47,955,05<br>5  | PKD1L1  | snp | NM_138295.2        | NP_612152.1        | - | 1,20<br>0  | A    | T    | 400       | Y  | N  | MISSENSE       | E0<br>1 | 2 | 3 |

|          |             |          |     |                    |                    |   |        |     |     |       |    |    |                |         |   |   |
|----------|-------------|----------|-----|--------------------|--------------------|---|--------|-----|-----|-------|----|----|----------------|---------|---|---|
| ch<br>r7 | 47,970,806  | PKD1L1   | snp | NM_138295.2        | NP_612152.1        | - | 630    | C   | T   | 210   | G  | R  | MISSENSE       | A0<br>1 | 2 | 3 |
| ch<br>r7 | 95,814,275  | SLC25A13 | snp | NM_00116021<br>0.1 | NP_00115368<br>2.1 | - | 1,174  | C   | A   | 327   | E  | D  | MISSENSE       | D0<br>1 | 1 | 2 |
| ch<br>r7 | 95,906,623  | SLC25A13 | ins | NM_00116021<br>0.1 | NP_00115368<br>2.1 | - | 287    |     | A   | 33    | FM | FH | FRAMESHI<br>FT | C0<br>1 | 1 | 2 |
| ch<br>r7 | 98,988,688  | ARPC1B   | snp | NM_005720.2        | NP_005711.1        | + | 762    | C   | T   | 224   | T  | I  | MISSENSE       | A0<br>1 | 2 | 2 |
| ch<br>r7 | 98,992,083  | ARPC1B   | snp | NM_005720.2        | NP_005711.1        | + | 1,179  | C   | T   | 363   | S  | L  | MISSENSE       | B0<br>1 | 2 | 2 |
| ch<br>r7 | 99,160,083  | ZNF655   | snp | NM_024061.3        | NP_076966.1        | + | 708    | A   | G   | 105   | M  | V  | MISSENSE       | B0<br>1 | 2 | 2 |
| ch<br>r7 | 99,160,083  | ZNF655   | snp | NM_024061.3        | NP_076966.1        | + | 708    | A   | G   | 105   | M  | V  | MISSENSE       | C0<br>1 | 2 | 2 |
| ch<br>r7 | 100,417,396 | EPHB4    | snp | NM_004444.4        | NP_004435.3        | - | 1,569  | C   | T   | 359   | R  | H  | MISSENSE       | B0<br>1 | 2 | 2 |
| ch<br>r7 | 100,421,431 | EPHB4    | snp | NM_004444.4        | NP_004435.3        | - | 735    | C   | T   | 81    | G  | D  | MISSENSE       | C0<br>1 | 2 | 2 |
| ch<br>r7 | 100,635,879 | MUC12    | snp | NM_00116446<br>2.1 | NP_00115793<br>4.1 | + | 2,035  | C   | A   | 678   | T  | N  | MISSENSE       | D0<br>1 | 1 | 2 |
| ch<br>r7 | 100,648,481 | MUC12    | snp | NM_00116446<br>2.1 | NP_00115793<br>4.1 | + | 14,637 | C   | A   | 4,879 | P  | T  | MISSENSE       | F0<br>1 | 1 | 2 |
| ch<br>r7 | 100,674,463 | MUC17    | snp | NM_00104010<br>5.1 | NP_00103519<br>4.1 | + | 198    | A   | G   | 48    | N  | S  | MISSENSE       | A0<br>1 | 2 | 2 |
| ch<br>r7 | 100,682,072 | MUC17    | snp | NM_00104010<br>5.1 | NP_00103519<br>4.1 | + | 7,428  | C   | G   | 2,458 | A  | G  | MISSENSE       | E0<br>1 | 2 | 2 |
| ch<br>r7 | 100,683,850 | MUC17    | snp | NM_00104010<br>5.1 | NP_00103519<br>4.1 | + | 9,206  | C   | A   | 3,051 | P  | T  | MISSENSE       | E0<br>1 | 1 | 2 |
| ch<br>r7 | 100,686,653 | MUC17    | ins | NM_00104010<br>5.1 | NP_00103519<br>4.1 | + | 12,009 |     | T   | 3,985 | S  | F  | FRAMESHI<br>FT | E0<br>1 | 2 | 2 |
| ch<br>r7 | 107,674,717 | LAMB4    | snp | NM_007356.2        | NP_031382.2        | - | 4,836  | G   | A   | 1,584 | R  | W  | MISSENSE       | A0<br>1 | 1 | 2 |
| ch<br>r7 | 107,689,885 | LAMB4    | sub | NM_007356.2        | NP_031382.2        | - | 4,088  | GCA | CTT | 1,334 | SA | SR | MISSENSE       | B0<br>1 | 1 | 2 |
| ch<br>r7 | 111,379,197 | DOCK4    | snp | NM_014705.3        | NP_055520.3        | - | 5,465  | G   | C   | 1,732 | P  | A  | MISSENSE       | D0<br>1 | 1 | 2 |
| ch<br>r7 | 111,580,165 | DOCK4    | snp | NM_014705.3        | NP_055520.3        | - | 1,244  | T   | C   | 325   | M  | V  | MISSENSE       | F0<br>1 | 2 | 2 |
| ch<br>r7 | 121,944,238 | FEZF1    | snp | NM_00116026<br>4.1 | NP_00115373<br>6.1 | - | 326    | T   | C   | 84    | S  | G  | MISSENSE       | B0<br>1 | 1 | 2 |
| ch<br>r7 | 121,944,238 | FEZF1    | snp | NM_00116026<br>4.1 | NP_00115373<br>6.1 | - | 326    | T   | C   | 84    | S  | G  | MISSENSE       | F0<br>1 | 1 | 2 |
| ch<br>r7 | 150,174,649 | GIMAP8   | snp | NM_175571.2        | NP_783161.1        | + | 2,109  | T   | C   | 593   | C  | R  | MISSENSE       | D0<br>1 | 1 | 2 |

|      |             |          |     |                 |                 |   |        |   |   |       |    |    |            |     |   |   |
|------|-------------|----------|-----|-----------------|-----------------|---|--------|---|---|-------|----|----|------------|-----|---|---|
| chr7 | 150,174,812 | GIMAP8   | snp | NM_175571.2     | NP_783161.1     | + | 2,272  | A | C | 647   | Q  | P  | MISSENSE   | A01 | 2 | 2 |
| chr7 | 158,679,716 | WDR60    | snp | NM_018051.4     | NP_060521.4     | + | 1,098  | C | T | 313   | A  | V  | MISSENSE   | D01 | 2 | 2 |
| chr7 | 158,704,360 | WDR60    | ins | NM_018051.4     | NP_060521.4     | + | 1,738  |   | A | 526   | NT | KY | FRAMESHIFT | F01 | 1 | 2 |
| chr8 | 11,400,820  | BLK      | snp | NM_001715.2     | NP_001706.2     | + | 668    | G | A | 29    | A  | T  | MISSENSE   | A01 | 1 | 2 |
| chr8 | 11,412,933  | BLK      | snp | NM_001715.2     | NP_001706.2     | + | 1,293  | G | A | 237   | R  | Q  | MISSENSE   | D01 | 1 | 2 |
| chr8 | 13,425,155  | C8orf48  | snp | NM_00100709.0.2 | NP_00100709.1.1 | + | 804    | A | C | 218   | K  | T  | MISSENSE   | C01 | 2 | 2 |
| chr8 | 13,425,155  | C8orf48  | snp | NM_00100709.0.2 | NP_00100709.1.1 | + | 804    | A | C | 218   | K  | T  | MISSENSE   | E01 | 2 | 2 |
| chr8 | 17,573,277  | MTUS1    | snp | NM_00100193.1.2 | NP_00100193.1.1 | - | 642    | T | C | 107   | K  | R  | MISSENSE   | F01 | 1 | 2 |
| chr8 | 17,611,797  | MTUS1    | snp | NM_00100192.4.2 | NP_00100192.4.1 | - | 1,992  | A | C | 506   | F  | V  | MISSENSE   | C01 | 2 | 2 |
| chr8 | 36,644,902  | KCNU1    | snp | NM_00103183.6.2 | NP_00102700.6.2 | + | 361    | A | G | 91    | E  | G  | MISSENSE   | D01 | 2 | 2 |
| chr8 | 36,780,142  | KCNU1    | snp | NM_00103183.6.2 | NP_00102700.6.2 | + | 2,818  | C | T | 910   | A  | V  | MISSENSE   | C01 | 2 | 2 |
| chr8 | 42,163,888  | IKBKB    | snp | NM_00119072.2.1 | NP_00117765.1.1 | + | 691    | A | C | 168   | Y  | S  | MISSENSE   | F01 | 2 | 2 |
| chr8 | 42,174,344  | IKBKB    | snp | NM_00119072.2.1 | NP_00117765.1.1 | + | 1,233  | G | T | 349   | D  | Y  | MISSENSE   | B01 | 2 | 2 |
| chr8 | 52,287,174  | PXDNL    | snp | NM_144651.4     | NP_653252.3     | - | 3,774  | C | T | 1,224 | R  | Q  | MISSENSE   | D01 | 2 | 2 |
| chr8 | 52,321,965  | PXDNL    | snp | NM_144651.4     | NP_653252.3     | - | 2,318  | G | A | 739   | P  | S  | MISSENSE   | F01 | 1 | 2 |
| chr8 | 110,393,639 | PKHD1L1  | snp | NM_177531.4     | NP_803875.2     | + | 308    | G | T | 68    | A  | S  | MISSENSE   | C01 | 2 | 2 |
| chr8 | 110,510,963 | PKHD1L1  | snp | NM_177531.4     | NP_803875.2     | + | 10,895 | A | C | 3,597 | S  | R  | MISSENSE   | F01 | 2 | 2 |
| chr8 | 144,942,299 | EPPK1    | snp | NM_031308.1     | NP_112598.2     | - | 5,134  | C | T | 1,707 | G  | S  | MISSENSE   | B01 | 2 | 2 |
| chr8 | 144,945,134 | EPPK1    | snp | NM_031308.1     | NP_112598.2     | - | 2,299  | C | A | 762   | D  | Y  | MISSENSE   | E01 | 1 | 2 |
| chr8 | 144,992,659 | PLEC1    | snp | NM_201384.1     | NP_958786.1     | - | 11,457 | C | T | 3,776 | E  | K  | MISSENSE   | D01 | 2 | 2 |
| chr8 | 145,004,372 | PLEC1    | snp | NM_201384.1     | NP_958786.1     | - | 2,679  | C | T | 850   | V  | M  | MISSENSE   | A01 | 2 | 2 |
| chr9 | 18,639,332  | ADAMTSL1 | snp | NM_052866.3     | NP_443098.3     | + | 884    | G | A | 252   | S  | N  | MISSENSE   | D01 | 1 | 2 |

|               |                 |          |     |                    |                    |   |            |      |   |           |    |   |          |         |   |   |
|---------------|-----------------|----------|-----|--------------------|--------------------|---|------------|------|---|-----------|----|---|----------|---------|---|---|
| ch<br>r9      | 18,906,81<br>3  | ADAMTSL1 | snp | NM_00104027<br>2.4 | NP_00103536<br>2.3 | + | 5,21<br>2  | C    | T | 1,69<br>5 | H  | Y | MISSENSE | B0<br>1 | 2 | 2 |
| ch<br>r9      | 35,906,54<br>3  | HRCT1    | snp | NM_00103979<br>2.1 | NP_00103488<br>1.1 | + | 355        | T    | A | 86        | L  | H | MISSENSE | D0<br>1 | 2 | 2 |
| ch<br>r9      | 35,906,54<br>9  | HRCT1    | snp | NM_00103979<br>2.1 | NP_00103488<br>1.1 | + | 361        | A    | C | 88        | H  | P | MISSENSE | C0<br>1 | 2 | 2 |
| ch<br>r9      | 86,554,60<br>7  | C9orf64  | snp | NM_032307.3        | NP_115683.3        | - | 1,09<br>1  | A    | G | 281       | S  | P | MISSENSE | C0<br>1 | 2 | 2 |
| ch<br>r9      | 86,571,12<br>5  | C9orf64  | snp | NM_032307.3        | NP_115683.3        | - | 537        | C    | T | 96        | S  | N | MISSENSE | F0<br>1 | 2 | 2 |
| ch<br>r9      | 113,163,2<br>40 | SVEP1    | snp | NM_153366.3        | NP_699197.3        | - | 10,0<br>51 | C    | T | 3,23<br>8 | V  | I | MISSENSE | C0<br>1 | 1 | 2 |
| ch<br>r9      | 113,169,0<br>12 | SVEP1    | snp | NM_153366.3        | NP_699197.3        | - | 9,20<br>3  | G    | A | 2,95<br>5 | A  | V | MISSENSE | C0<br>1 | 1 | 2 |
| ch<br>r9      | 113,205,9<br>62 | SVEP1    | snp | NM_153366.3        | NP_699197.3        | - | 4,83<br>7  | T    | A | 1,50<br>0 | N  | Y | MISSENSE | A0<br>1 | 1 | 2 |
| ch<br>r9      | 116,191,1<br>86 | C9orf43  | snp | NM_152786.1        | NP_689999.1        | + | 1,56<br>0  | C    | T | 371       | T  | M | MISSENSE | B0<br>1 | 2 | 3 |
| ch<br>r9      | 116,191,1<br>86 | C9orf43  | snp | NM_152786.1        | NP_689999.1        | + | 1,56<br>0  | C    | T | 371       | T  | M | MISSENSE | D0<br>1 | 2 | 3 |
| ch<br>r9      | 116,191,1<br>86 | C9orf43  | snp | NM_152786.1        | NP_689999.1        | + | 1,56<br>0  | C    | T | 371       | T  | M | MISSENSE | E0<br>1 | 2 | 3 |
| ch<br>r9      | 123,903,0<br>50 | CEP110   | snp | NM_007018.4        | NP_008949.4        | + | 2,50<br>0  | A    | G | 823       | T  | A | MISSENSE | E0<br>1 | 2 | 2 |
| ch<br>r9      | 123,904,5<br>37 | CEP110   | snp | NM_007018.4        | NP_008949.4        | + | 2,89<br>1  | T    | C | 953       | L  | S | MISSENSE | C0<br>1 | 1 | 2 |
| ch<br>r9      | 131,581,1<br>60 | ENDOG    | snp | NM_004435.2        | NP_004426.2        | + | 382        | G    | C | 65        | K  | N | MISSENSE | F0<br>1 | 1 | 2 |
| ch<br>r9      | 131,584,8<br>83 | ENDOG    | del | NM_004435.2        | NP_004426.2        | + | 1,07<br>3  | AAGT |   | 296       | K* | ? | NONSTOP  | A0<br>1 | 2 | 2 |
| ch<br>r9      | 133,799,6<br>37 | FIBCD1   | snp | NM_032843.4        | NP_116232.3        | - | 942        | C    | T | 232       | R  | Q | MISSENSE | B0<br>1 | 2 | 2 |
| ch<br>r9      | 133,804,9<br>85 | FIBCD1   | snp | NM_032843.4        | NP_116232.3        | - | 764        | C    | T | 173       | A  | T | MISSENSE | A0<br>1 | 2 | 2 |
| ch<br>r9      | 138,661,8<br>29 | KCNT1    | snp | NM_020822.2        | NP_065873.2        | + | 1,62<br>1  | G    | A | 515       | M  | I | MISSENSE | B0<br>1 | 1 | 2 |
| ch<br>r9      | 138,678,1<br>53 | KCNT1    | snp | NM_020822.2        | NP_065873.2        | + | 3,36<br>2  | G    | A | 1,09<br>6 | G  | S | MISSENSE | D0<br>1 | 1 | 2 |
| ch<br>r1<br>0 | 5,541,276       | CALML5   | snp | NM_017422.4        | NP_059118.2        | - | 256        | T    | C | 41        | K  | R | MISSENSE | B0<br>1 | 1 | 2 |
| ch<br>r1<br>0 | 5,541,276       | CALML5   | snp | NM_017422.4        | NP_059118.2        | - | 256        | T    | C | 41        | K  | R | MISSENSE | D0<br>1 | 1 | 2 |

|       |             |           |     |                 |                 |   |       |   |            |       |       |        |            |     |   |   |
|-------|-------------|-----------|-----|-----------------|-----------------|---|-------|---|------------|-------|-------|--------|------------|-----|---|---|
| chr10 | 19,422,643  | C10orf112 | snp | XM_295865.8     | XP_295865.8     | + | 705   | A | C          | 235   | T     | P      | MISSENSE   | E01 | 2 | 2 |
| chr10 | 19,678,529  | C10orf112 | snp | XM_295865.8     | XP_295865.8     | + | 4,653 | C | T          | 1,551 | L     | F      | MISSENSE   | B01 | 2 | 2 |
| chr10 | 46,965,802  | SYT15     | snp | NM_181519.2     | NP_852660.1     | - | 886   | C | T          | 244   | G     | D      | MISSENSE   | B01 | 2 | 2 |
| chr10 | 46,967,492  | SYT15     | snp | NM_181519.2     | NP_852660.1     | - | 736   | C | T          | 194   | R     | H      | MISSENSE   | D01 | 2 | 2 |
| chr10 | 46,967,533  | SYT15     | snp | NM_181519.2     | NP_852660.1     | - | 695   | G | T          | 180   | C     | *      | NONSENSE   | B01 | 2 | 2 |
| chr10 | 49,393,642  | FRMPD2    | snp | NM_00101807.1.3 | NP_00101808.1.3 | - | 2,642 | C | T          | 770   | R     | Q      | MISSENSE   | B01 | 2 | 2 |
| chr10 | 49,430,387  | FRMPD2    | del | NM_00101807.1.3 | NP_00101808.1.3 | - | 1,753 | A |            | 474   | L     | C      | FRAMESHIFT | E01 | 2 | 2 |
| chr10 | 49,431,224  | FRMPD2    | snp | NM_00101807.1.3 | NP_00101808.1.3 | - | 1,587 | C | A          | 418   | M     | I      | MISSENSE   | E01 | 1 | 2 |
| chr10 | 49,457,149  | FRMPD2    | snp | NM_00101807.1.3 | NP_00101808.1.3 | - | 553   | G | C          | 74    | R     | G      | MISSENSE   | B01 | 1 | 2 |
| chr10 | 76,789,773  | MYST4     | ins | NM_012330.2     | NP_036462.2     | + | 5,684 |   | GCTGCAGCAT | 1,736 | QTSIS | HAAAN  | FRAMESHIFT | D01 | 2 | 2 |
| chr10 | 76,789,778  | MYST4     | snp | NM_012330.2     | NP_036462.2     | + | 5,689 | A | T          | 1,732 | S     | C      | MISSENSE   | E01 | 1 | 2 |
| chr10 | 115,374,673 | NRAP      | snp | NM_006175.3     | NP_006166.3     | - | 3,168 | C | T          | 1,001 | R     | Q      | MISSENSE   | E01 | 2 | 2 |
| chr10 | 115,388,685 | NRAP      | snp | NM_006175.3     | NP_006166.3     | - | 2,193 | A | G          | 676   | L     | P      | MISSENSE   | A01 | 2 | 2 |
| chr10 | 115,399,984 | NRAP      | snp | NM_006175.3     | NP_006166.3     | - | 1,486 | C | T          | 440   |       | ATAAGT | DISRUPT    | E01 | 2 | 2 |
| chr10 | 127,677,219 | FANK1     | snp | NM_145235.3     | NP_660278.3     | + | 395   | C | T          | 97    | P     | S      | MISSENSE   | A01 | 2 | 2 |

|       |             |       |     |             |             |   |        |                           |            |       |        |      |            |     |   |   |  |  |  |
|-------|-------------|-------|-----|-------------|-------------|---|--------|---------------------------|------------|-------|--------|------|------------|-----|---|---|--|--|--|
| 0     |             |       |     |             |             |   |        |                           |            |       |        |      |            |     |   |   |  |  |  |
| chr10 | 127,693,483 | FANK1 | del | NM_145235.3 | NP_660278.3 | + | 674    | GA                        |            | 190   | D      | C    | FRAMESHIFT | C01 | 2 | 2 |  |  |  |
| chr11 | 1,078,564   | MUC2  | snp | NM_002457.2 | NP_002448.2 | + | 799    | C                         | T          | 257   | P      | L    | MISSENSE   | A01 | 2 | 2 |  |  |  |
| chr11 | 1,096,513   | MUC2  | snp | NM_002457.2 | NP_002448.2 | + | 13,651 | G                         | A          | 4,541 | R      | H    | MISSENSE   | B01 | 1 | 2 |  |  |  |
| chr11 | 1,266,598   | MUC5B | snp | NM_002458.2 | NP_002449.2 | + | 8,547  | C                         | T          | 2,829 | P      | L    | MISSENSE   | F01 | 2 | 3 |  |  |  |
| chr11 | 1,266,628   | MUC5B | snp | NM_002458.2 | NP_002449.2 | + | 8,577  | C                         | T          | 2,839 | T      | M    | MISSENSE   | D01 | 2 | 3 |  |  |  |
| chr11 | 1,270,317   | MUC5B | ins | NM_002458.2 | NP_002449.2 | + | 12,266 |                           | GTCCAGCCCT | 4,069 | HPSS   | VQPS | FRAMESHIFT | F01 | 2 | 3 |  |  |  |
| chr11 | 1,271,992   | MUC5B | sub | NM_002458.2 | NP_002449.2 | + | 13,941 | CCACACCC<br>ACAACCAG<br>T | GA         | 4,627 | TTPTTS | R    | DELETE+    | A01 | 2 | 3 |  |  |  |
| chr11 | 1,272,787   | MUC5B | snp | NM_002458.2 | NP_002449.2 | + | 14,736 | C                         | T          | 4,892 | T      | M    | MISSENSE   | D01 | 2 | 3 |  |  |  |
| chr11 | 6,555,243   | DNHD1 | snp | NM_144666.2 | NP_653267.2 | + | 3,402  | G                         | T          | 946   | E      | *    | NONSENSE   | C01 | 2 | 3 |  |  |  |
| chr11 | 6,567,432   | DNHD1 | snp | NM_144666.2 | NP_653267.2 | + | 5,827  | G                         | A          | 1,754 | R      | H    | MISSENSE   | D01 | 1 | 3 |  |  |  |
| chr11 | 6,568,232   | DNHD1 | snp | NM_144666.2 | NP_653267.2 | + | 6,627  | G                         | C          | 2,021 | G      | R    | MISSENSE   | A01 | 1 | 3 |  |  |  |
| chr11 | 43,465,020  | TTC17 | snp | NM_018259.5 | NP_060729.2 | + | 2,467  | C                         | T          | 799   | R      | W    | MISSENSE   | C01 | 2 | 2 |  |  |  |
| chr11 | 43,469,617  | TTC17 | snp | NM_018259.5 | NP_060729.2 | + | 2,801  | T                         | C          | 910   | V      | A    | MISSENSE   | D01 | 1 | 2 |  |  |  |
| chr11 | 44,193,164  | EXT2  | snp | NM_207122.1 | NP_997005.1 | + | 1,511  | G                         | A          | 392   | R      | Q    | MISSENSE   | D01 | 1 | 2 |  |  |  |

|       |             |          |     |                |                |   |        |                            |      |       |        |    |            |     |   |   |
|-------|-------------|----------|-----|----------------|----------------|---|--------|----------------------------|------|-------|--------|----|------------|-----|---|---|
| chr11 | 44,254,029  | EXT2     | snp | NM_207122.1    | NP_997005.1    | + | 2,123  | C                          | T    | 596   | A      | V  | MISSENSE   | E01 | 2 | 2 |
| chr11 | 57,070,275  | TNKS1BP1 | ins | NM_033396.2    | NP_203754.2    | - | 4,505  |                            | CC   | 1,446 | PP     | PA | FRAMESHIFT | E01 | 1 | 2 |
| chr11 | 57,080,676  | TNKS1BP1 | ins | NM_033396.2    | NP_203754.2    | - | 1,650  |                            | GAGG | 498   | PI     | LP | FRAMESHIFT | F01 | 2 | 2 |
| chr11 | 57,088,127  | TNKS1BP1 | del | NM_033396.2    | NP_203754.2    | - | 300    | TGGCTTGG<br>CAGGCAGG<br>GC |      | 49    | KPALPA |    | DELETE     | E01 | 1 | 2 |
| chr11 | 62,289,320  | AHNAK    | snp | NM_001620.1    | NP_001611.1    | - | 12,867 | T                          | C    | 4,189 | K      | E  | MISSENSE   | B01 | 1 | 2 |
| chr11 | 62,291,360  | AHNAK    | snp | NM_001620.1    | NP_001611.1    | - | 10,827 | T                          | C    | 3,509 | M      | V  | MISSENSE   | E01 | 1 | 2 |
| chr11 | 89,075,266  | NOX4     | snp | NM_016931.3    | NP_058627.1    | - | 1,550  | A                          | C    | 437   | F      | V  | MISSENSE   | A01 | 2 | 3 |
| chr11 | 89,075,266  | NOX4     | snp | NM_001143837.1 | NP_001137309.1 | - | 1,775  | A                          | C    | 413   | F      | V  | MISSENSE   | A01 | 2 | 3 |
| chr11 | 89,182,665  | NOX4     | snp | NM_001143836.1 | NP_001137308.1 | - | 529    | C                          | A    | 96    | L      | F  | MISSENSE   | B01 | 1 | 3 |
| chr11 | 89,223,714  | NOX4     | snp | NM_001143836.1 | NP_001137308.1 | - | 302    | A                          | T    | 21    | W      | R  | MISSENSE   | C01 | 2 | 3 |
| chr11 | 92,533,557  | FAT3     | snp | NM_001008781.2 | NP_001008781.2 | + | 7,395  | G                          | A    | 2,459 | R      | Q  | MISSENSE   | B01 | 1 | 2 |
| chr11 | 92,577,780  | FAT3     | snp | NM_001008781.2 | NP_001008781.2 | + | 11,264 | G                          | T    | 3,749 | E      | *  | NONSENSE   | C01 | 2 | 2 |
| chr11 | 96,074,986  | MAML2    | snp | NM_032427.1    | NP_115803.1    | - | 1,357  | C                          | A    | 24    | G      | W  | MISSENSE   | D01 | 1 | 2 |
| chr11 | 96,074,028  | MAML2    | snp | NM_032427.2    | NP_115803.2    | - | 1,318  | C                          | A    | 11    | A      | S  | MISSENSE   | N/A | 1 | 2 |
| chr11 | 108,122,589 | ATM      | snp | NM_000051.3    | NP_000042.3    | + | 2,018  | C                          | T    | 544   | A      | V  | MISSENSE   | E01 | 2 | 3 |



|   |    |             |              |     |                |                |   |        |                                        |     |       |                |    |                |     |   |   |
|---|----|-------------|--------------|-----|----------------|----------------|---|--------|----------------------------------------|-----|-------|----------------|----|----------------|-----|---|---|
| 1 | ch | 108,122,603 | ATM          | snp | NM_000051.3    | NP_000042.3    | + | 2,032  | A                                      | G   | 549   | I              | V  | MISSENSE       | A01 | 2 | 3 |
| 1 | ch | 108,192,065 | ATM          | snp | NM_000051.3    | NP_000042.3    | + | 6,875  | A                                      | G   | 2,163 | E              | G  | MISSENSE       | F01 | 2 | 3 |
| 1 | ch | 117,308,648 | DSCAML1      | snp | NM_020693.2    | NP_065744.2    | - | 4,575  | C                                      | T   | 1,524 | R              | H  | MISSENSE       | E01 | 2 | 2 |
| 1 | ch | 117,395,611 | DSCAML1      | snp | NM_020693.2    | NP_065744.2    | - | 1,026  | C                                      | T   | 341   | S              | N  | MISSENSE       | C01 | 2 | 2 |
| 2 | ch | 10,862,594  | CSDA         | snp | NM_003651.4    | NP_003642.3    | - | 934    | T                                      | G   | 230   | Q              | P  | MISSENSE       | E01 | 1 | 2 |
| 2 | ch | 10,862,602  | CSDA         | del | NM_003651.4    | NP_003642.3    | - | 915    | ATACTGGG<br>GGCG                       |     | 225   | PQYR           |    | DELETE         | C01 | 2 | 2 |
| 2 | ch | 40,874,761  | LOC100506072 | snp | XM_003118944.1 | XP_003118992.1 | + | 6,681  | C                                      | T   | 2,102 | P              | S  | MISSENSE       | B01 | 2 | 4 |
| 2 | ch | 40,878,406  | LOC100506072 | snp | XM_003118944.1 | XP_003118992.1 | + | 10,326 | T                                      | C   | 3,317 | S              | P  | MISSENSE       | B01 | 1 | 4 |
| 2 | ch | 40,879,527  | LOC100506072 | ins | XM_003118944.1 | XP_003118992.1 | + | 11,389 | AAGTGACAGG<br>GACAACTGGA<br>CCATTAGCTG |     | 3,671 | EVTGTTG<br>PLA |    | INSERT         | A01 | 1 | 4 |
| 2 | ch | 40,883,583  | LOC100506072 | sub | XM_003118944.1 | XP_003118992.1 | + | 15,445 | AA                                     | GG  | 5,023 | E              | G  | MISSENSE       | B01 | 1 | 4 |
| 2 | ch | 40,883,643  | LOC100506072 | snp | XM_003118944.1 | XP_003118992.1 | + | 15,505 | A                                      | G   | 5,043 | E              | G  | MISSENSE       | D01 | 2 | 4 |
| 2 | ch | 40,883,643  | LOC100506072 | snp | XM_003118944.1 | XP_003118992.1 | + | 15,505 | A                                      | G   | 5,043 | E              | G  | MISSENSE       | E01 | 2 | 4 |
| 2 | ch | 40,883,646  | LOC100506072 | snp | XM_003118944.1 | XP_003118992.1 | + | 15,508 | T                                      | C   | 5,044 | I              | T  | MISSENSE       | D01 | 2 | 4 |
| 2 | ch | 40,884,664  | LOC100506072 | sub | XM_003118944.1 | XP_003118992.1 | + | 16,526 | AC                                     | CAT | 5,383 | TP             | TI | FRAMESHI<br>FT | A01 | 2 | 4 |

|   |    |           |         |     |                    |                    |   |       |                             |       |          |    |                |     |   |   |
|---|----|-----------|---------|-----|--------------------|--------------------|---|-------|-----------------------------|-------|----------|----|----------------|-----|---|---|
| 2 | ch | 49,433,25 | MLL2    | del | NM_003482.3        | NP_003473.3        | - | 8,171 | CTCAAAGG<br>CAGGGCTG<br>CTG | 2,725 | SPAFEQQL | *  | NONSENSE       | C01 | 2 | 3 |
| 2 | ch | 49,434,69 | MLL2    | ins | NM_003482.3        | NP_003473.3        | - | 6,854 |                             | 2,285 | E        | R  | FRAMESHI<br>FT | A01 | 2 | 3 |
| 2 | ch | 49,435,23 | MLL2    | snp | NM_003482.3        | NP_003473.3        | - | 6,312 | G                           | 2,104 | R        | C  | MISSENSE       | D01 | 1 | 3 |
| 2 | ch | 50,186,35 | NCKAP5L | snp | NM_00103780<br>6.3 | NP_00103289<br>5.2 | - | 3,869 | C                           | 1,222 | G        | V  | MISSENSE       | D01 | 1 | 2 |
| 2 | ch | 50,190,18 | NCKAP5L | snp | NM_00103780<br>6.3 | NP_00103289<br>5.2 | - | 1,655 | C                           | 484   | R        | P  | MISSENSE       | E01 | 2 | 2 |
| 2 | ch | 50,745,01 | FAM186A | snp | NM_00114547<br>5.1 | NP_00113894<br>7.1 | - | 5,737 | G                           | 1,866 | S        | F  | MISSENSE       | A01 | 1 | 2 |
| 2 | ch | 50,747,31 | FAM186A | snp | NM_00114547<br>5.1 | NP_00113894<br>7.1 | - | 3,439 | A                           | 1,100 | L        | P  | MISSENSE       | E01 | 2 | 2 |
| 2 | ch | 53,162,77 | KRT76   | del | NM_015848.4        | NP_056932.2        | - | 1,692 | ACT                         | 546   | S        |    | DELETE         | F01 | 1 | 2 |
| 2 | ch | 53,170,95 | KRT76   | snp | NM_015848.4        | NP_056932.2        | - | 169   | G                           | 38    | A        | G  | MISSENSE       | D01 | 1 | 2 |
| 2 | ch | 111,893,9 | ATXN2   | ins | NM_002973.3        | NP_002964.3        | - | 3,818 |                             | 1,218 | PA       | PS | FRAMESHI<br>FT | A01 | 2 | 2 |
| 2 | ch | 111,902,5 | ATXN2   | snp | NM_002973.3        | NP_002964.3        | - | 3,483 | G                           | 1,107 | P        | S  | MISSENSE       | D01 | 1 | 2 |
| 2 | ch | 121,881,5 | KDM2B   | snp | NM_032590.4        | NP_115979.3        | - | 2,598 | G                           | 831   | S        | L  | MISSENSE       | C01 | 1 | 2 |
| 2 | ch | 122,018,7 | KDM2B   | snp | NM_032590.4        | NP_115979.3        | - | 159   | T                           | 18    | H        | R  | MISSENSE       | B01 | 1 | 2 |
| 2 | ch | 124,821,5 | NCOR2   | snp | NM_006312.4        | NP_006303.3        | - | 6,241 | G                           | 1,973 | S        | C  | MISSENSE       | B01 | 1 | 3 |

|       |             |              |     |                |                |   |        |                                  |    |       |              |                         |          |     |   |   |
|-------|-------------|--------------|-----|----------------|----------------|---|--------|----------------------------------|----|-------|--------------|-------------------------|----------|-----|---|---|
| chr12 | 124,856,829 | NCOR2        | snp | NM_006312.4    | NP_006303.3    | - | 2,865  | C                                | T  | 848   | E            | K                       | MISSENSE | B01 | 2 | 3 |
| chr12 | 124,856,829 | NCOR2        | snp | NM_006312.4    | NP_006303.3    | - | 2,865  | C                                | T  | 848   | E            | K                       | MISSENSE | E01 | 2 | 3 |
| chr12 | 124,885,169 | NCOR2        | snp | NM_006312.4    | NP_006303.3    | - | 2,010  | C                                | T  | 563   | V            | M                       | MISSENSE | D01 | 2 | 3 |
| chr12 | 132,466,834 | EP400        | sub | NM_015409.3    | NP_056224.2    | + | 1,846  | CC                               | AT | 579   | P            | M                       | MISSENSE | C01 | 1 | 2 |
| chr12 | 132,466,834 | EP400        | sub | NM_015409.3    | NP_056224.2    | + | 1,846  | CC                               | AT | 579   | P            | M                       | MISSENSE | D01 | 1 | 2 |
| chr13 | 25,009,612  | PARP4        | snp | NM_006437.3    | NP_006428.2    | - | 3,771  | C                                | T  | 1,221 |              | CTGTCTT<br>CTGGGCA<br>A | DISRUPT  | F01 | 2 | 2 |
| chr13 | 25,075,770  | PARP4        | snp | NM_006437.3    | NP_006428.2    | - | 439    | C                                | T  | 111   | E            | K                       | MISSENSE | A01 | 2 | 2 |
| chr13 | 45,008,838  | TSC22D1      | snp | NM_183422.2    | NP_904358.2    | - | 3,635  | G                                | A  | 1,048 | P            | S                       | MISSENSE | D01 | 1 | 2 |
| chr13 | 45,148,069  | TSC22D1      | snp | NM_183422.2    | NP_904358.2    | - | 2,631  | C                                | A  | 713   | G            | V                       | MISSENSE | D01 | 2 | 2 |
| chr13 | 45,149,972  | TSC22D1      | snp | NM_183422.2    | NP_904358.2    | - | 728    | G                                | A  | 79    | P            | S                       | MISSENSE | C01 | 1 | 2 |
| chr13 | 64,407,057  | LOC100507505 | del | XM_003118893.1 | XP_003118941.1 | - | 45     | ACCAGAGC<br>CATAGCCA<br>CAGCCATA |    | 21    | SGYGCGY<br>G |                         | DELETE   | C01 | 2 | 2 |
| chr13 | 64,407,057  | LOC100507505 | del | XM_003118893.1 | XP_003118941.1 | - | 45     | ACCAGAGC<br>CATAGCCA<br>CAGCCATA |    | 21    | SGYGCGY<br>G |                         | DELETE   | F01 | 2 | 2 |
| chr13 | 103,382,690 | hCG_2011852  | snp | NM_001146197.1 | NP_001139669.1 | - | 20,495 | A                                | G  | 6,785 | C            | R                       | MISSENSE | F01 | 2 | 3 |
| chr13 | 103,383,357 | hCG_2011852  | snp | NM_001146197.1 | NP_001139669.1 | - | 19,828 | T                                | A  | 6,562 | K            | N                       | MISSENSE | A01 | 1 | 3 |
| chr13 | 103,384,133 | hCG_2011852  | snp | NM_001146197.1 | NP_001139669.1 | - | 19,052 | G                                | A  | 6,304 | Q            | *                       | NONSENSE | E01 | 1 | 3 |

3

|       |             |             |     |                |                |   |       |   |   |       |   |   |            |     |   |   |
|-------|-------------|-------------|-----|----------------|----------------|---|-------|---|---|-------|---|---|------------|-----|---|---|
| chr13 | 103,393,784 | hCG_2011852 | snp | NM_001146197.1 | NP_001139669.1 | - | 9,401 | G | A | 3,087 | L | F | MISSENSE   | A01 | 1 | 3 |
| chr14 | 20,295,970  | OR4N2       | snp | NM_001004723.1 | NP_001004723.1 | + | 363   | C | T | 121   | R | C | MISSENSE   | B01 | 2 | 2 |
| chr14 | 20,295,970  | OR4N2       | snp | NM_001004723.1 | NP_001004723.1 | + | 363   | C | T | 121   | R | C | MISSENSE   | F01 | 2 | 2 |
| chr14 | 21,780,007  | RPGRIP1     | snp | NM_020366.3    | NP_065099.3    | + | 955   | A | G | 318   | H | R | MISSENSE   | C01 | 2 | 2 |
| chr14 | 21,794,176  | RPGRIP1     | snp | NM_020366.3    | NP_065099.3    | + | 2,554 | G | A | 851   | R | Q | MISSENSE   | F01 | 1 | 2 |
| chr14 | 22,102,841  | OR10G2      | snp | NM_001005466.1 | NP_001005466.1 | - | 156   | T | C | 52    | M | V | MISSENSE   | D01 | 1 | 2 |
| chr14 | 22,102,912  | OR10G2      | snp | NM_001005466.1 | NP_001005466.1 | - | 85    | C | T | 28    | S | N | MISSENSE   | C01 | 2 | 2 |
| chr14 | 23,299,145  | MRPL52      | snp | NM_180982.2    | NP_851313.1    | + | 54    | T | C | 8     | F | L | MISSENSE   | F01 | 1 | 2 |
| chr14 | 23,302,646  | MRPL52      | snp | NM_181304.2    | NP_851821.1    | + | 390   | A | G | -     | M | V | MISSTART   | D01 | 2 | 2 |
| chr14 | 24,769,179  | C14orf21    | snp | NM_174913.1    | NP_777573.1    | + | 82    | C | T | 6     | S | F | MISSENSE   | A01 | 2 | 2 |
| chr14 | 24,769,808  | C14orf21    | snp | NM_174913.1    | NP_777573.1    | + | 505   | G | A | 147   | S | N | MISSENSE   | B01 | 1 | 2 |
| chr14 | 24,770,874  | C14orf21    | snp | NM_174913.1    | NP_777573.1    | + | 817   | C | G | 251   | T | S | MISSENSE   | A01 | 2 | 2 |
| chr14 | 24,773,417  | C14orf21    | snp | NM_174913.1    | NP_777573.1    | + | 1,644 | G | A | 527   | D | N | MISSENSE   | A01 | 1 | 2 |
| chr14 | 58,899,156  | KIAA0586    | del | NM_014749.3    | NP_055564.3    | + | 664   | G |   | 130   | R | K | FRAMESHIFT | D01 | 1 | 2 |

|       |             |               |     |                |                |   |        |   |    |       |    |    |            |     |   |   |
|-------|-------------|---------------|-----|----------------|----------------|---|--------|---|----|-------|----|----|------------|-----|---|---|
| chr14 | 58,955,529  | KIAA0586      | snp | NM_014749.3    | NP_055564.3    | + | 3,763  | T | C  | 1,163 | L  | S  | MISSENSE   | F01 | 1 | 2 |
| chr14 | 64,443,403  | SYNE2         | snp | NM_015180.4    | NP_055995.4    | + | 1,481  | C | G  | 417   | Q  | E  | MISSENSE   | B01 | 2 | 2 |
| chr14 | 64,610,627  | SYNE2         | snp | NM_015180.4    | NP_055995.4    | + | 15,674 | C | T  | 5,148 | R  | C  | MISSENSE   | A01 | 2 | 2 |
| chr14 | 104,642,758 | KIF26A        | snp | NM_015656.1    | NP_056471.1    | + | 3,633  | C | T  | 1,211 | R  | W  | MISSENSE   | B01 | 2 | 2 |
| chr14 | 104,642,951 | KIF26A        | snp | NM_015656.1    | NP_056471.1    | + | 3,826  | T | C  | 1,275 | M  | T  | MISSENSE   | A01 | 1 | 2 |
| chr14 | 105,415,406 | AHNAK2        | del | NM_138420.2    | NP_612429.2    | - | 6,500  | T |    | 2,126 | RA | RP | FRAMESHIFT | B01 | 1 | 3 |
| chr14 | 105,418,302 | AHNAK2        | snp | NM_138420.2    | NP_612429.2    | - | 3,604  | C | T  | 1,161 | R  | K  | MISSENSE   | C01 | 2 | 3 |
| chr14 | 105,419,134 | AHNAK2        | snp | NM_138420.2    | NP_612429.2    | - | 2,772  | G | A  | 884   | P  | S  | MISSENSE   | A01 | 1 | 3 |
| chr15 | 34,649,536  | C15orf55      | snp | NM_175741.1    | NP_786883.1    | + | 3,398  | G | A  | 1,081 | A  | T  | MISSENSE   | E01 | 1 | 2 |
| chr15 | 34,649,615  | C15orf55      | snp | NM_175741.1    | NP_786883.1    | + | 3,477  | G | A  | 1,107 | R  | Q  | MISSENSE   | B01 | 1 | 2 |
| chr15 | 42,120,341  | JMJD7-PLA2G4B | snp | NM_005090.3    | NP_005081.1    | + | 59     | A | G  | 6     | E  | G  | MISSENSE   | C01 | 2 | 2 |
| chr15 | 42,120,341  | JMJD7-PLA2G4B | snp | NM_005090.3    | NP_005081.1    | + | 59     | A | G  | 6     | E  | G  | MISSENSE   | F01 | 2 | 2 |
| chr15 | 42,120,341  | JMJD7         | snp | NM_001114632.1 | NP_001108104.1 | + | 59     | A | G  | 6     | E  | G  | MISSENSE   | C01 | 2 | 2 |
| chr15 | 42,120,341  | JMJD7         | snp | NM_001114632.1 | NP_001108104.1 | + | 59     | A | G  | 6     | E  | G  | MISSENSE   | F01 | 2 | 2 |
| chr19 | 42,974,699  | STARD9        | sub | NM_020759.2    | NP_065810.2    | + | 2,520  | A | CT | 821   | R  | L  | FRAMESHIFT | D01 | 2 | 4 |

5  
ch  
r1  
6  
ch  
r1  
6  
ch  
r1  
6  
ch  
r1  
6  
ch  
r1  
6

|            |           |     |                |                |   |        |    |   |       |    |    |            |     |   |   |
|------------|-----------|-----|----------------|----------------|---|--------|----|---|-------|----|----|------------|-----|---|---|
| 42,974,703 | STARD9    | del | NM_020759.2    | NP_065810.2    | + | 2,524  | G  |   | 822   | S  | T  | FRAMESHIFT | D01 | 2 | 4 |
| 42,985,989 | STARD9    | snp | NM_020759.2    | NP_065810.2    | + | 12,270 | A  | G | 4,071 | T  | A  | MISSENSE   | B01 | 2 | 4 |
| 43,008,922 | STARD9    | snp | NM_020759.2    | NP_065810.2    | + | 13,389 | C  | T | 4,444 | R  | *  | NONSENSE   | E01 | 2 | 4 |
| 43,011,689 | STARD9    | snp | NM_020759.2    | NP_065810.2    | + | 14,077 | G  | A | 4,673 | G  | D  | MISSENSE   | A01 | 1 | 4 |
| 63,046,034 | TLN2      | snp | NM_015059.2    | NP_055874.2    | + | 4,395  | C  | T | 1,465 | P  | S  | MISSENSE   | A01 | 2 | 2 |
| 63,097,808 | TLN2      | snp | NM_015059.2    | NP_055874.2    | + | 6,487  | C  | T | 2,162 | S  | L  | MISSENSE   | B01 | 2 | 2 |
| 72,190,293 | MYO9A     | snp | NM_006901.2    | NP_008832.2    | - | 5,022  | C  | T | 1,516 | R  | H  | MISSENSE   | C01 | 2 | 2 |
| 72,190,695 | MYO9A     | snp | NM_006901.2    | NP_008832.2    | - | 4,620  | G  | A | 1,382 | A  | V  | MISSENSE   | B01 | 1 | 2 |
| 76,673,927 | SCAPER    | snp | NM_001145923.1 | NP_001139395.1 | - | 3,697  | G  | C | 919   | Q  | E  | MISSENSE   | C01 | 1 | 2 |
| 76,696,900 | SCAPER    | snp | NM_001145923.1 | NP_001139395.1 | - | 3,632  | T  | C | 897   | H  | R  | MISSENSE   | A01 | 1 | 2 |
| 812,699    | MSLN      | snp | NM_005823.5    | NP_005814.2    | + | 187    | G  | A | 6     | R  | Q  | MISSENSE   | B01 | 1 | 2 |
| 818,521    | MSLN      | del | NM_005823.5    | NP_005814.2    | + | 1,907  | CG |   | 579   | GG | GH | FRAMESHIFT | E01 | 2 | 2 |
| 4,625,930  | LOC342346 | snp | NM_001145011.1 | NP_001138483.1 | + | 1,449  | C  | T | 483   | R  | C  | MISSENSE   | D01 | 2 | 2 |
| 4,650,313  | LOC342346 | snp | NM_001145011.1 | NP_001138483.1 | + | 3,421  | C  | T | 1,140 | P  | L  | MISSENSE   | A01 | 2 | 2 |

|       |            |        |     |                |                |   |        |     |    |       |   |                        |          |     |   |   |
|-------|------------|--------|-----|----------------|----------------|---|--------|-----|----|-------|---|------------------------|----------|-----|---|---|
| chr16 | 4,934,634  | PPL    | snp | NM_002705.4    | NP_002696.3    | - | 4,110  | C   | T  | 1,340 | E | K                      | MISSENSE | D01 | 2 | 2 |
| chr16 | 4,935,911  | PPL    | snp | NM_002705.4    | NP_002696.3    | - | 2,833  | C   | A  | 914   | S | I                      | MISSENSE | B01 | 1 | 2 |
| chr16 | 10,775,948 | TEKT5  | snp | NM_144674.1    | NP_653275.1    | - | 835    | T   | C  | 254   | D | G                      | MISSENSE | B01 | 1 | 2 |
| chr16 | 10,788,293 | TEKT5  | snp | NM_144674.1    | NP_653275.1    | - | 508    | G   | A  | 145   | S | L                      | MISSENSE | D01 | 1 | 2 |
| chr16 | 20,944,599 | DNAH3  | snp | NM_017539.1    | NP_060009.1    | - | 12,226 | C   | T  | 4,075 | R | K                      | MISSENSE | A01 | 2 | 2 |
| chr16 | 21,049,219 | DNAH3  | snp | NM_017539.1    | NP_060009.1    | - | 4,812  | C   | T  | 1,604 | A | T                      | MISSENSE | C01 | 2 | 2 |
| chr16 | 28,403,354 | EIF3CL | del | NM_001099661.1 | NP_001093131.1 | - | 971    | CTC |    | 294   | E |                        | DELETE   | D01 | 1 | 2 |
| chr16 | 28,403,363 | EIF3CL | del | NM_001099661.1 | NP_001093131.1 | - | 962    | CTC |    | 294   | E |                        | DELETE   | B01 | 1 | 2 |
| chr16 | 70,897,086 | HYDIN  | snp | NM_032821.2    | NP_116210.2    | - | 11,595 | T   | C  | 3,822 |   | CTGATCG<br>ATTGCG<br>G | DISRUPT  | A01 | 1 | 3 |
| chr16 | 70,928,376 | HYDIN  | snp | NM_032821.2    | NP_116210.2    | - | 9,347  | G   | A  | 3,073 | R | C                      | MISSENSE | E01 | 1 | 3 |
| chr16 | 70,952,280 | HYDIN  | snp | NM_032821.2    | NP_116210.2    | - | 7,961  | C   | T  | 2,611 | A | T                      | MISSENSE | C01 | 2 | 3 |
| chr16 | 88,494,602 | ZNF469 | sub | NM_001127464.1 | NP_001120936.1 | + | 724    | GC  | TT | 241   | S | I                      | MISSENSE | C01 | 2 | 2 |
| chr16 | 88,495,574 | ZNF469 | snp | NM_001127464.1 | NP_001120936.1 | + | 1,696  | C   | T  | 565   | A | V                      | MISSENSE | D01 | 1 | 2 |
| chr16 | 88,804,363 | FAM38A | snp | NM_001142864.2 | NP_001136336.2 | - | 997    | C   | T  | 332   | R | H                      | MISSENSE | F01 | 2 | 2 |
| chr16 | 88,808,727 | FAM38A | snp | NM_001142864.2 | NP_001136336.2 | - | 262    | T   | C  | 87    | D | G                      | MISSENSE | A01 | 1 | 2 |

|       |            |              |     |                |                |   |       |     |     |       |    |    |            |     |   |   |  |  |
|-------|------------|--------------|-----|----------------|----------------|---|-------|-----|-----|-------|----|----|------------|-----|---|---|--|--|
| 6     |            |              |     |                |                |   |       |     |     |       |    |    |            |     |   |   |  |  |
| chr17 | 650,206    | GEMIN4       | snp | NM_015721.2    | NP_056536.2    | - | 1,194 | G   | A   | 358   | A  | V  | MISSENSE   | B01 | 1 | 2 |  |  |
| chr17 | 650,795    | GEMIN4       | snp | NM_015721.2    | NP_056536.2    | - | 605   | C   | T   | 162   | V  | I  | MISSENSE   | F01 | 2 | 2 |  |  |
| chr17 | 11,501,864 | DNAH9        | snp | NM_001372.3    | NP_001363.2    | + | 117   | G   | T   | 16    | G  | V  | MISSENSE   | C01 | 2 | 2 |  |  |
| chr17 | 11,659,960 | DNAH9        | snp | NM_001372.3    | NP_001363.2    | + | 6,882 | G   | A   | 2,271 | R  | H  | MISSENSE   | A01 | 1 | 2 |  |  |
| chr17 | 17,698,855 | RAI1         | snp | NM_030665.3    | NP_109590.3    | + | 3,062 | T   | C   | 864   | L  | P  | MISSENSE   | C01 | 1 | 2 |  |  |
| chr17 | 17,700,042 | RAI1         | del | NM_030665.3    | NP_109590.3    | + | 4,249 | GAG |     | 1,260 | E  |    | DELETE     | F01 | 1 | 2 |  |  |
| chr17 | 18,881,468 | FAM83G       | snp | NM_001039999.2 | NP_001035088.2 | - | 1,676 | C   | A   | 503   | V  | L  | MISSENSE   | A01 | 1 | 2 |  |  |
| chr17 | 18,881,604 | FAM83G       | snp | NM_001039999.2 | NP_001035088.2 | - | 1,540 | C   | A   | 457   | Q  | H  | MISSENSE   | E01 | 1 | 2 |  |  |
| chr17 | 33,680,507 | SLFN11       | snp | NM_001104590.1 | NP_001098060.1 | - | 2,122 | C   | T   | 589   | R  | H  | MISSENSE   | D01 | 2 | 3 |  |  |
| chr17 | 33,690,314 | SLFN11       | snp | NM_001104590.1 | NP_001098060.1 | - | 865   | T   | C   | 170   | K  | R  | MISSENSE   | B01 | 1 | 3 |  |  |
| chr17 | 33,690,425 | SLFN11       | snp | NM_001104590.1 | NP_001098060.1 | - | 754   | C   | T   | 133   | R  | H  | MISSENSE   | A01 | 2 | 3 |  |  |
| chr17 | 33,806,513 | LOC100506736 | snp | XM_003118755.1 | XP_003118803.1 | - | 1,680 | T   | A   | 267   | I  | F  | MISSENSE   | F01 | 1 | 2 |  |  |
| chr17 | 33,807,028 | LOC100506736 | sub | XM_003118755.1 | XP_003118803.1 | - | 1,164 | CA  | GAG | 95    | CA | LC | FRAMESHIFT | E01 | 2 | 2 |  |  |
| chr17 | 34,186,055 | C17orf66     | snp | NM_152781.2    | NP_689994.2    | - | 923   | C   | T   | 258   | E  | K  | MISSENSE   | E01 | 2 | 2 |  |  |



|       |            |          |     |             |             |   |       |   |                                |       |    |         |            |     |   |   |
|-------|------------|----------|-----|-------------|-------------|---|-------|---|--------------------------------|-------|----|---------|------------|-----|---|---|
| chr17 | 34,192,350 | C17orf66 | snp | NM_152781.2 | NP_689994.2 | - | 336   | G | A                              | 62    | P  | L       | MISSENSE   | C01 | 1 | 2 |
| chr17 | 35,896,177 | SYNRG    | snp | NM_198882.1 | NP_942583.1 | - | 3,417 | G | A                              | 1,111 | A  | V       | MISSENSE   | D01 | 1 | 2 |
| chr17 | 35,902,203 | SYNRG    | snp | NM_198882.1 | NP_942583.1 | - | 2,920 | A | C                              | 945   | F  | L       | MISSENSE   | B01 | 2 | 2 |
| chr17 | 36,623,094 | ARHGAP23 | snp | NM_020876.1 | NP_065927.1 | + | 1,550 | G | T                              | 296   | A  | S       | MISSENSE   | D01 | 2 | 2 |
| chr17 | 36,623,094 | ARHGAP23 | snp | NM_020876.1 | NP_065927.1 | + | 1,550 | G | T                              | 296   | A  | S       | MISSENSE   | F01 | 2 | 2 |
| chr17 | 39,183,016 | KRTAP1-5 | del | NM_031957.1 | NP_114163.1 | - | 437   | G |                                | 131   | PC | PA      | FRAMESHIFT | B01 | 2 | 2 |
| chr17 | 39,183,016 | KRTAP1-5 | del | NM_031957.1 | NP_114163.1 | - | 437   | G |                                | 131   | PC | PA      | FRAMESHIFT | C01 | 1 | 2 |
| chr17 | 39,254,246 | KRTAP4-8 | snp | NM_031960.2 | NP_114166.1 | - | 128   | A | T                              | 29    | C  | *       | NONSENSE   | D01 | 2 | 2 |
| chr17 | 39,254,246 | KRTAP4-8 | snp | NM_031960.2 | NP_114166.1 | - | 128   | A | T                              | 29    | C  | *       | NONSENSE   | F01 | 2 | 2 |
| chr17 | 39,254,256 | KRTAP4-8 | snp | NM_031960.2 | NP_114166.1 | - | 118   | G | T                              | 26    | P  | H       | MISSENSE   | D01 | 2 | 2 |
| chr17 | 39,254,256 | KRTAP4-8 | snp | NM_031960.2 | NP_114166.1 | - | 118   | G | T                              | 26    | P  | H       | MISSENSE   | F01 | 2 | 2 |
| chr17 | 55,183,854 | AKAP1    | ins | NM_003488.3 | NP_003479.1 | + | 1,260 |   | GGCTTGGATA<br>GAAATGAGGAG<br>G | 343   |    | GLDRNEE | INSERT     | A01 | 1 | 2 |
| chr17 | 55,183,854 | AKAP1    | ins | NM_003488.3 | NP_003479.1 | + | 1,260 |   | GGCTTGGATA<br>GAAATGAGGAG<br>G | 343   |    | GLDRNEE | INSERT     | B01 | 1 | 2 |
| chr17 | 56,329,651 | LPO      | snp | NM_006151.2 | NP_006142.1 | + | 1,205 | T | A                              | 296   | I  | N       | MISSENSE   | E01 | 1 | 2 |
| chr17 | 56,343,533 | LPO      | snp | NM_006151.2 | NP_006142.1 | + | 1,855 | C | T                              | 513   | R  | W       | MISSENSE   | D01 | 2 | 2 |

|       |            |         |     |                |                |   |       |         |          |       |     |     |            |     |   |   |  |
|-------|------------|---------|-----|----------------|----------------|---|-------|---------|----------|-------|-----|-----|------------|-----|---|---|--|
| 7     |            |         |     |                |                |   |       |         |          |       |     |     |            |     |   |   |  |
| chr17 | 62,019,040 | SCN4A   | snp | NM_000334.4    | NP_000325.4    | - | 4,677 | G       | A        | 1,533 | T   | M   | MISSENSE   | F01 | 1 | 2 |  |
| chr17 | 62,022,043 | SCN4A   | ins | NM_000334.4    | NP_000325.4    | - | 3,978 |         | TCT      | 1,304 |     | K   | INSERT     | C01 | 2 | 2 |  |
| chr18 | 28,581,653 | DSC3    | snp | NM_024423.2    | NP_077741.2    | - | 2,319 | C       | T        | 721   | R   | H   | MISSENSE   | A01 | 2 | 2 |  |
| chr18 | 28,602,410 | DSC3    | snp | NM_024423.2    | NP_077741.2    | - | 987   | G       | A        | 277   | T   | M   | MISSENSE   | C01 | 1 | 2 |  |
| chr19 | 619,238    | POLRMT  | snp | NM_005035.3    | NP_005026.3    | - | 3,179 | C       | T        | 1,041 | E   | K   | MISSENSE   | C01 | 2 | 2 |  |
| chr19 | 632,848    | POLRMT  | snp | NM_005035.3    | NP_005026.3    | - | 233   | C       | T        | 59    | V   | M   | MISSENSE   | F01 | 2 | 2 |  |
| chr19 | 2,403,122  | TMPRSS9 | snp | NM_182973.1    | NP_892018.1    | + | 497   | T       | A        | 165   | C   | *   | NONSENSE   | B01 | 1 | 2 |  |
| chr19 | 2,421,963  | TMPRSS9 | snp | NM_182973.1    | NP_892018.1    | + | 2,164 | C       | A        | 721   | T   | K   | MISSENSE   | D01 | 1 | 2 |  |
| chr19 | 4,511,223  | PLIN4   | sub | NM_001080400.1 | NP_001073869.1 | - | 2,703 | GCC     | ACT      | 901   | G   | S   | MISSENSE   | C01 | 1 | 3 |  |
| chr19 | 4,511,749  | PLIN4   | snp | NM_001080400.1 | NP_001073869.1 | - | 2,179 | G       | A        | 726   | A   | V   | MISSENSE   | F01 | 1 | 3 |  |
| chr19 | 4,512,777  | PLIN4   | sub | NM_001080400.1 | NP_001073869.1 | - | 1,150 | AC      | G        | 383   | GT  | AR  | FRAMESHIFT | A01 | 1 | 3 |  |
| chr19 | 4,512,780  | PLIN4   | snp | NM_001080400.1 | NP_001073869.1 | - | 1,148 | C       | T        | 382   | M   | I   | MISSENSE   | A01 | 2 | 3 |  |
| chr19 | 4,512,782  | PLIN4   | sub | NM_001080400.1 | NP_001073869.1 | - | 1,140 | TGACCAT | GTCAGGAC | 380   | MVM | VLT | FRAMESHIFT | A01 | 1 | 3 |  |
| chr19 | 4,512,788  | PLIN4   | snp | NM_001080400.1 | NP_001073869.1 | - | 1,140 | T       | C        | 380   | M   | V   | MISSENSE   | A01 | 2 | 3 |  |

|       |            |        |     |                 |                 |   |        |   |   |        |   |   |            |     |   |   |
|-------|------------|--------|-----|-----------------|-----------------|---|--------|---|---|--------|---|---|------------|-----|---|---|
| chr19 | 6,755,178  | SH2D3A | snp | NM_005490.2     | NP_005481.2     | - | 837    | C | T | 214    | R | Q | MISSENSE   | A01 | 2 | 2 |
| chr19 | 6,760,706  | SH2D3A | snp | NM_005490.2     | NP_005481.2     | - | 554    | G | A | 120    | R | * | NONSENSE   | F01 | 1 | 2 |
| chr19 | 8,182,160  | FBN3   | ins | NM_032447.3     | NP_115823.3     | - | 3,499  |   | T | 1,159  | R | Q | FRAMESHIFT | A01 | 2 | 2 |
| chr19 | 8,212,234  | FBN3   | snp | NM_032447.3     | NP_115823.3     | - | 150    | G | A | 43     | R | C | MISSENSE   | B01 | 1 | 2 |
| chr19 | 9,011,443  | MUC16  | snp | NM_024690.2     | NP_078966.2     | - | 38,992 | C | T | 12,929 | R | H | MISSENSE   | E01 | 2 | 4 |
| chr19 | 9,058,488  | MUC16  | snp | NM_024690.2     | NP_078966.2     | - | 29,160 | T | C | 9,652  | I | V | MISSENSE   | A01 | 1 | 4 |
| chr19 | 9,068,108  | MUC16  | snp | NM_024690.2     | NP_078966.2     | - | 19,540 | G | A | 6,445  | A | V | MISSENSE   | A01 | 1 | 4 |
| chr19 | 9,086,982  | MUC16  | snp | NM_024690.2     | NP_078966.2     | - | 5,035  | G | T | 1,610  | T | K | MISSENSE   | F01 | 2 | 4 |
| chr19 | 9,090,040  | MUC16  | snp | NM_024690.2     | NP_078966.2     | - | 1,977  | C | T | 591    | G | R | MISSENSE   | B01 | 2 | 4 |
| chr19 | 9,577,373  | ZNF560 | snp | NM_152476.2     | NP_689689.2     | - | 2,458  | C | T | 749    | R | H | MISSENSE   | C01 | 2 | 2 |
| chr19 | 9,579,829  | ZNF560 | snp | NM_152476.2     | NP_689689.2     | - | 772    | G | A | 187    | A | V | MISSENSE   | A01 | 1 | 2 |
| chr19 | 16,855,891 | NWD1   | snp | NM_00100752.5.2 | NP_00100752.6.2 | + | 1,503  | G | C | 8      | G | R | MISSENSE   | E01 | 1 | 2 |
| chr19 | 16,860,095 | NWD1   | snp | NM_00100752.5.2 | NP_00100752.6.2 | + | 1,716  | T | C | 79     | C | R | MISSENSE   | E01 | 2 | 2 |
| chr19 | 16,870,168 | NWD1   | snp | NM_00100752.5.2 | NP_00100752.6.2 | + | 2,976  | C | T | 499    | R | C | MISSENSE   | C01 | 2 | 2 |
| chr19 | 17,836,791 | MAP1S  | snp | NM_018174.4     | NP_060644.4     | + | 607    | A | G | 199    | Q | R | MISSENSE   | A01 | 2 | 2 |

|   |               |                |           |     |                    |                    |   |           |     |                  |           |   |      |                |         |   |   |
|---|---------------|----------------|-----------|-----|--------------------|--------------------|---|-----------|-----|------------------|-----------|---|------|----------------|---------|---|---|
| 9 | ch<br>r1<br>9 | 17,837,75<br>9 | MAP1S     | snp | NM_018174.4        | NP_060644.4        | + | 1,57<br>5 | C   | T                | 522       | R | W    | MISSENSE       | C0<br>1 | 2 | 2 |
| 9 | ch<br>r1<br>9 | 38,834,22<br>5 | CATSPERG  | snp | NM_021185.4        | NP_067008.3        | + | 417       | G   | T                | 110       | E | *    | NONSENSE       | E0<br>1 | 2 | 2 |
| 9 | ch<br>r1<br>9 | 38,853,15<br>6 | CATSPERG  | del | NM_021185.4        | NP_067008.3        | + | 2,38<br>5 | A   |                  | 766       | S | A    | FRAMESHI<br>FT | A0<br>1 | 2 | 2 |
| 9 | ch<br>r1<br>9 | 39,399,92<br>1 | LOC643669 | del | XM_933621.5        | XP_938714.3        | - | 875       | TTC |                  | 293       | K |      | DELETE         | F0<br>1 | 1 | 2 |
| 9 | ch<br>r1<br>9 | 39,401,29<br>1 | LOC643669 | snp | XM_933621.5        | XP_938714.3        | - | 744       | T   | C                | 248       | R | G    | MISSENSE       | C0<br>1 | 1 | 2 |
| 9 | ch<br>r1<br>9 | 41,114,40<br>7 | LTBP4     | sub | NM_003573.2        | NP_003564.2        | + | 1,41<br>4 | GC  | CT               | 471       | R | P    | MISSENSE       | C0<br>1 | 1 | 2 |
| 9 | ch<br>r1<br>9 | 41,128,56<br>5 | LTBP4     | snp | NM_003573.2        | NP_003564.2        | + | 3,56<br>7 | G   | A                | 1,18<br>9 | E | K    | MISSENSE       | A0<br>1 | 1 | 2 |
| 9 | ch<br>r1<br>9 | 41,173,87<br>0 | NUMBL     | ins | NM_004756.3        | NP_004747.1        | - | 1,50<br>0 |     | TTGCTGCTGC<br>TG | 445       |   | QQQQ | INSERT         | F0<br>1 | 2 | 2 |
| 9 | ch<br>r1<br>9 | 41,179,45<br>5 | NUMBL     | snp | NM_004756.3        | NP_004747.1        | - | 996       | C   | A                | 276       | A | S    | MISSENSE       | A0<br>1 | 1 | 2 |
| 9 | ch<br>r1<br>9 | 42,510,09<br>3 | GRIK5     | snp | NM_002088.3        | NP_002079.3        | - | 2,07<br>8 | G   | A                | 681       | R | W    | MISSENSE       | B0<br>1 | 1 | 2 |
| 9 | ch<br>r1<br>9 | 42,558,58<br>3 | GRIK5     | snp | NM_002088.3        | NP_002079.3        | - | 978       | A   | G                | 314       | V | A    | MISSENSE       | A0<br>1 | 2 | 2 |
| 9 | ch<br>r1<br>9 | 46,914,46<br>2 | CCDC8     | snp | NM_032040.3        | NP_114429.2        | - | 2,45<br>6 | T   | G                | 534       | E | D    | MISSENSE       | F0<br>1 | 1 | 2 |
| 9 | ch<br>r1<br>9 | 46,915,11<br>3 | CCDC8     | snp | NM_032040.3        | NP_114429.2        | - | 1,80<br>5 | A   | C                | 317       | N | K    | MISSENSE       | D0<br>1 | 2 | 2 |
| 9 | ch<br>r1<br>9 | 48,047,72<br>8 | ZNF541    | snp | NM_00110141<br>9.1 | NP_00109488<br>9.1 | - | 2,05<br>6 | G   | C                | 685       | T | S    | MISSENSE       | D0<br>1 | 1 | 2 |

|       |            |         |     |                |                |   |       |    |    |     |    |                         |            |     |   |   |
|-------|------------|---------|-----|----------------|----------------|---|-------|----|----|-----|----|-------------------------|------------|-----|---|---|
| chr19 | 48,047,728 | ZNF541  | snp | NM_001101419.1 | NP_001094889.1 | - | 2,056 | G  | C  | 685 | T  | S                       | MISSENSE   | F01 | 1 | 2 |
| chr19 | 50,393,042 | IL4I1   | snp | NM_152899.1    | NP_690863.1    | - | 1,665 | C  | T  | 529 | V  | M                       | MISSENSE   | C01 | 2 | 2 |
| chr19 | 50,399,160 | IL4I1   | snp | NM_152899.1    | NP_690863.1    | - | 240   | G  | A  | 54  | R  | W                       | MISSENSE   | E01 | 1 | 2 |
| chr19 | 54,723,032 | LILRB3  | ins | NM_006864.2    | NP_006855.2    | - | 1,502 |    | G  | 464 | R  | P                       | FRAMESHIFT | E01 | 2 | 2 |
| chr19 | 54,725,155 | LILRB3  | sub | NM_006864.2    | NP_006855.2    | - | 863   | TG | CA | 250 | YN | YD                      | MISSENSE   | C01 | 1 | 2 |
| chr19 | 57,640,668 | USP29   | snp | NM_020903.2    | NP_065954.1    | + | 981   | A  | T  | 208 | N  | I                       | MISSENSE   | C01 | 2 | 2 |
| chr19 | 57,642,393 | USP29   | snp | NM_020903.2    | NP_065954.1    | + | 2,706 | T  | C  | 783 | L  | P                       | MISSENSE   | E01 | 1 | 2 |
| chr19 | 58,773,338 | ZNF544  | snp | NM_014480.2    | NP_055295.2    | + | 1,840 | G  | T  | 455 | R  | I                       | MISSENSE   | E01 | 2 | 2 |
| chr19 | 58,773,540 | ZNF544  | snp | NM_014480.2    | NP_055295.2    | + | 2,042 | C  | G  | 522 | N  | K                       | MISSENSE   | A01 | 2 | 2 |
| chr20 | 3,211,845  | SLC4A11 | snp | NM_032034.3    | NP_114423.1    | - | 1,086 | G  | A  | 346 | R  | W                       | MISSENSE   | D01 | 1 | 2 |
| chr20 | 3,218,664  | SLC4A11 | snp | NM_001174090.1 | NP_001167561.1 | - | 170   | C  | T  | 15  | D  | N                       | MISSENSE   | E01 | 1 | 2 |
| chr20 | 6,065,917  | FERMT1  | snp | NM_017671.4    | NP_060141.3    | - | 2,176 | T  | C  | 462 | Q  | R                       | MISSENSE   | A01 | 1 | 2 |
| chr20 | 6,077,648  | FERMT1  | snp | NM_017671.4    | NP_060141.3    | - | 1,777 | T  | A  | 329 | E  | V                       | MISSENSE   | C01 | 1 | 2 |
| chr20 | 30,330,341 | TPX2    | snp | NM_012112.4    | NP_036244.2    | + | 521   | A  | T  | -   |    | TTCTGCT<br>TCTTCCT<br>G | DISRUPT    | F01 | 2 | 2 |
| chr20 | 30,370,111 | TPX2    | snp | NM_012112.4    | NP_036244.2    | + | 1,812 | T  | A  | 371 | L  | Q                       | MISSENSE   | A01 | 1 | 2 |

|       |            |         |     |                |                |   |       |     |   |       |   |   |          |     |   |   |  |  |  |
|-------|------------|---------|-----|----------------|----------------|---|-------|-----|---|-------|---|---|----------|-----|---|---|--|--|--|
| 0     |            |         |     |                |                |   |       |     |   |       |   |   |          |     |   |   |  |  |  |
| chr20 | 32,664,916 | RALY    | snp | NM_007367.2    | NP_031393.2    | + | 991   | G   | A | 231   | G | S | MISSENSE | E01 | 1 | 2 |  |  |  |
| chr20 | 32,664,916 | RALY    | snp | NM_007367.2    | NP_031393.2    | + | 991   | G   | A | 231   | G | S | MISSENSE | F01 | 1 | 2 |  |  |  |
| chr20 | 39,978,435 | LPIN3   | snp | NM_022896.1    | NP_075047.1    | + | 751   | T   | A | 220   | S | T | MISSENSE | D01 | 1 | 2 |  |  |  |
| chr20 | 39,987,410 | LPIN3   | snp | NM_022896.1    | NP_075047.1    | + | 2,551 | C   | T | 820   | R | C | MISSENSE | B01 | 2 | 2 |  |  |  |
| chr20 | 46,262,805 | NCOA3   | snp | NM_181659.2    | NP_858045.1    | + | 1,239 | C   | T | 326   | H | Y | MISSENSE | A01 | 2 | 2 |  |  |  |
| chr20 | 46,264,405 | NCOA3   | snp | NM_181659.2    | NP_858045.1    | + | 1,713 | C   | T | 484   | R | C | MISSENSE | B01 | 2 | 2 |  |  |  |
| chr20 | 61,451,332 | COL9A3  | snp | NM_001853.3    | NP_001844.3    | + | 310   | G   | A | 102   | R | Q | MISSENSE | B01 | 1 | 2 |  |  |  |
| chr20 | 61,461,757 | COL9A3  | snp | NM_001853.3    | NP_001844.3    | + | 1,210 | G   | C | 402   | G | A | MISSENSE | C01 | 1 | 2 |  |  |  |
| chr20 | 61,470,064 | COL9A3  | snp | NM_001853.3    | NP_001844.3    | + | 1,818 | G   | A | 605   | A | T | MISSENSE | B01 | 1 | 2 |  |  |  |
| chr20 | 61,939,414 | COL20A1 | del | NM_020882.2    | NP_065933.2    | + | 847   | CGC |   | 249   | R |   | DELETE   | F01 | 2 | 3 |  |  |  |
| chr20 | 61,939,928 | COL20A1 | snp | NM_020882.2    | NP_065933.2    | + | 910   | C   | G | 270   | Q | E | MISSENSE | B01 | 2 | 3 |  |  |  |
| chr20 | 61,943,841 | COL20A1 | snp | NM_020882.2    | NP_065933.2    | + | 1,973 | G   | A | 624   | R | H | MISSENSE | A01 | 1 | 3 |  |  |  |
| chr21 | 38,568,210 | TTC3    | snp | NM_001001894.1 | NP_001001894.1 | + | 5,557 | G   | T | 1,817 | R | L | MISSENSE | B01 | 2 | 2 |  |  |  |
| chr21 | 38,568,251 | TTC3    | snp | NM_001001894.1 | NP_001001894.1 | + | 5,598 | C   | T | 1,831 | R | C | MISSENSE | A01 | 2 | 2 |  |  |  |

|       |            |              |     |                |                |   |       |   |             |     |       |        |            |     |   |   |
|-------|------------|--------------|-----|----------------|----------------|---|-------|---|-------------|-----|-------|--------|------------|-----|---|---|
| chr21 | 43,274,689 | PRDM15       | snp | NM_001040424.1 | NP_001035514.1 | - | 735   | C | T           | 211 | G     | S      | MISSENSE   | C01 | 1 | 2 |
| chr21 | 43,282,032 | PRDM15       | snp | NM_022115.3    | NP_071398.3    | - | 812   | C | T           | 233 |       | ATGTGT | DISRUPT    | A01 | 2 | 2 |
| chr22 | 22,283,408 | LOC100507442 | snp | XM_003118824.1 | XP_003118872.1 | - | 1,096 | A | G           | 111 | W     | R      | MISSENSE   | D01 | 2 | 2 |
| chr22 | 22,283,410 | LOC100507442 | snp | XM_003118824.1 | XP_003118872.1 | - | 1,094 | G | A           | 110 | A     | V      | MISSENSE   | C01 | 1 | 2 |
| chr22 | 30,517,769 | HORMAD2      | snp | NM_152510.2    | NP_689723.1    | + | 624   | A | G           | 186 | Y     | C      | MISSENSE   | C01 | 2 | 2 |
| chr22 | 30,518,165 | HORMAD2      | snp | NM_152510.2    | NP_689723.1    | + | 846   | G | A           | 260 | G     | D      | MISSENSE   | E01 | 1 | 2 |
| chr22 | 30,776,105 | RNF215       | snp | NM_001017981.1 | NP_001017981.1 | - | 952   | G | C           | 317 | P     | R      | MISSENSE   | C01 | 1 | 2 |
| chr22 | 30,776,310 | RNF215       | snp | NM_001017981.1 | NP_001017981.1 | - | 823   | C | T           | 274 | R     | Q      | MISSENSE   | B01 | 2 | 2 |
| chr22 | 42,609,792 | TCF20        | snp | NM_181492.1    | NP_852469.1    | - | 1,652 | G | C           | 506 | P     | A      | MISSENSE   | E01 | 1 | 2 |
| chr22 | 42,610,036 | TCF20        | ins | NM_181492.1    | NP_852469.1    | - | 1,409 |   | G           | 426 | S     | Q      | FRAMESHIFT | E01 | 2 | 2 |
| chr22 | 42,610,594 | TCF20        | ins | NM_181492.1    | NP_852469.1    | - | 851   |   | GGA         | 246 |       | S      | INSERT     | F01 | 2 | 2 |
| chr22 | 50,278,661 | ZBED4        | ins | NM_014838.2    | NP_055653.2    | + | 1,821 |   | AAAAGGTCATG | 455 | RLKSE | RS*    | NONSENSE   | A01 | 2 | 2 |
| chr22 | 50,278,661 | ZBED4        | ins | NM_014838.2    | NP_055653.2    | + | 1,821 |   | AAAAGGTCATG | 455 | RLKSE | RS*    | NONSENSE   | C01 | 2 | 2 |
| chrX  | 9,935,685  | LOC100288814 | snp | NM_001195081.1 | NP_001182010.1 | + | 288   | A | G           | 96  | S     | G      | MISSENSE   | A01 | 2 | 2 |
| chrX  | 9,935,850  | LOC100288814 | snp | NM_001195081.1 | NP_001182010.1 | + | 453   | G | A           | 151 | V     | I      | MISSENSE   | E01 | 2 | 2 |
| chr   | 66,765,26  | AR           | ins | NM_000044.2    | NP_000035.2    | + | 1,38  |   | CAG         | 91  |       | Q      | INSERT     | B01 | 1 | 2 |

|    |           |           |     |             |             |   |      |   |            |     |      |      |          |    |   |   |  |  |  |
|----|-----------|-----------|-----|-------------|-------------|---|------|---|------------|-----|------|------|----------|----|---|---|--|--|--|
| rX | 1         |           |     |             |             |   |      | 8 |            |     |      |      |          |    | 1 |   |  |  |  |
| ch | 66,941,75 | AR        | snp | NM_000044.2 | NP_000035.2 | + | 3,50 | C | G          | 798 | Q    | E    | MISSENSE | E0 | 2 | 2 |  |  |  |
| rX | 0         |           |     |             |             |   | 9    |   |            |     |      |      |          | 1  |   |   |  |  |  |
| ch | 70,516,49 | NONO      | ins | NM_007363.4 | NP_031389.3 | + | 1,32 |   | A          | 243 | NQ   | KP   | FRAMESHI | C0 | 1 | 2 |  |  |  |
| rX | 5         |           |     |             |             |   | 7    |   |            |     |      |      | FT       | 1  |   |   |  |  |  |
| ch | 70,518,59 | NONO      | snp | NM_007363.4 | NP_031389.3 | + | 1,80 | G | A          | 403 | A    | T    | MISSENSE | E0 | 1 | 2 |  |  |  |
| rX | 4         |           |     |             |             |   | 5    |   |            |     |      |      |          | 1  |   |   |  |  |  |
| ch | 84,601,03 | POF1B     | snp | NM_024921.3 | NP_079197.3 | - | 699  | T | C          | 184 | Q    | R    | MISSENSE | A0 | 1 | 2 |  |  |  |
| rX | 4         |           |     |             |             |   |      |   |            |     |      |      |          | 1  |   |   |  |  |  |
| ch | 84,634,41 | POF1B     | ins | NM_024921.3 | NP_079197.3 | - | 192  |   | AGCTGCTGGG | 20  | EVLQ | AAPR | FRAMESHI | D0 | 1 | 2 |  |  |  |
| rX | 3         |           |     |             |             |   |      |   |            |     |      |      | FT       | 1  |   |   |  |  |  |
| ch | 152,584,9 | LOC649201 | snp | XM_00112721 | XP_00112721 | - | 1,31 | G | A          | 438 | R    | C    | MISSENSE | A0 | 1 | 3 |  |  |  |
| rX | 58        |           |     | 1.3         | 1.3         |   | 4    |   |            |     |      |      |          | 1  |   |   |  |  |  |
| ch | 152,586,1 | LOC649201 | snp | XM_00112721 | XP_00112721 | - | 572  | T | C          | 190 | I    | M    | MISSENSE | C0 | 1 | 3 |  |  |  |
| rX | 41        |           |     | 1.3         | 1.3         |   |      |   |            |     |      |      |          | 1  |   |   |  |  |  |
| ch | 152,587,0 | LOC649201 | snp | XM_00112721 | XP_00112721 | - | 112  | C | T          | 37  | R    | K    | MISSENSE | F0 | 1 | 3 |  |  |  |
| rX | 01        |           |     | 1.3         | 1.3         |   |      |   |            |     |      |      |          | 1  |   |   |  |  |  |

Genes for which novel deviations from reference genome were identified in two or more of the six index SMZL genomes are shown. Alterations affecting the coding region or spliceosome recognition sequence of the indicated genes not present in dbSNP are listed in chromosomal order. Var: The type of deviation from reference sequence identified; snp- single nucleotide polymorphism, ins- insertion, del- deletion, sub- substitution. Str: strandedness of the gene. Ref: reference sequence nucleotide or amino acid at the position indicated. Call: called sequence for of the indicated SMZL genome. Impact- predicted functional consequence on protein coding of deviation indicated. bp- base pair, aa- amino acid. Gen: genome identifier, corresponds to Figure 1 legend. A01, B01, C01 are the NOTCH2 mutated genomes depicted in Figure 2. All: Allele. No: number of genomes with sequence deviation from reference (of six total). Asterisk indicates stop codon. Mutations identified in MAML2 by whole genome sequencing or by direct Sanger DNA sequencing are also shown.



**Table S3.** Primers used for amplification prior to Sanger sequencing.

| Fragment | Forward Primer Sequence for Amplification | Reverse Primer Sequence for Amplification | Size (nt) | Exon | Amino Acid Residues |      |
|----------|-------------------------------------------|-------------------------------------------|-----------|------|---------------------|------|
|          |                                           |                                           |           |      | Begin               | End  |
| 34       | GTGGAGGTTTTCTAGAAACCTCA                   | GCACAATACTGGCTCAGACAG                     | 371       | 25   | 1335                | 1420 |
| 35       | GAGTCAGGCTGTGCCAGTA                       | CTGTTCAGGCCTCATCACA                       | 212       | 25   | 1385                | 1430 |
| 36       | GGTAGCCGCTGTGAACCTCTA                     | CGAGAAACTGAAGTGTGTAGTGA                   | 351       | 25   | 1420                | 1504 |
| 37       | AGCTCCAGTCTAATCTGAGCTCT                   | CAGGTGGCATCAATACCACA                      | 208       | 26   | 1505                | 1545 |
| 38       | GGTGCAACAGTGAGGAGTGT                      | TAGCCTTGAAGTTCAGAAACCA                    | 329       | 26   | 1530                | 1620 |
| 39       | ATGACATGTTCTGCCTGACCT                     | CCTTTACACCCAGTGCCACTC                     | 244       | 27   | 1621                | 1668 |
| 40       | ATCTAATGCTGACATTGAGAGGT                   | AGAGAGAGCCATGCTTACGCT                     | 192       | 28   | 1669                | 1700 |
| 41       | GTTGCTGTTGTGCATCTTCTGT                    | AATCATGATTCAACAAGATATGC                   | 244       | 28   | 1690                | 1738 |
| 42       | GTGTCATGGTGGAAAGTGTG                      | CAGATAATGGCTGACAATGGTG                    | 221       | 29   | 1739                | 1770 |
| 43       | AAACAATGGGAGATAAGCAGCGGTGGTG              | GACAACAATGTGGAACCATG                      | 337       | 30   | 1771                | 1827 |
| 44       | CAAATAGAGCTGTTTCAACCATAG                  | ATTGGCATCTGCACCTGCATC                     | 310       | 31   | 1828                | 1895 |
| 45       | AGATGCAGAGGACTCTTCTGCT                    | TATTATTCAAGTACTCTTCTCATGTT                | 268       | 31   | 1870                | 1927 |
| 46       | CTACACTGTAGCCTCAGCTCTGAT                  | CCAAATCCCTGCCTTTCATC                      | 274       | 32   | 1928                | 1977 |
| 47       | CATTGTGCAAGTCATAGTGTCTT                   | GAATGGGCTTATAACTGAGGCA                    | 233       | 33   | 1977                | 2009 |
| 48       | CTCAAGAGTGTATTAAACATGTGTTT                | CTTCAGGCTGAGGAAAGATCTG                    | 305       | 34   | 2010                | 2080 |
| 49       | TCGCATGCACCATGACATTG                      | GGATAAAGTACTGAACTCTCAGAC                  | 292       | 34   | 2060                | 2140 |
| 50       | TTGCCAAGGAGGCAAAGGATG                     | CTCACTGAGGGAAGCACAGT                      | 310       | 34   | 2130                | 2210 |
| 51       | TGGGATCTTACAGGCCTCAC                      | CCAGGACCATAACCAACATC                      | 299       | 34   | 2185                | 2260 |
| 52       | CGCATGGAGGTGAATGAGA                       | CCATTCTGGAATCTGGTACAT                     | 271       | 34   | 2260                | 2335 |
| 53       | CTAAAGGCAGTATTGCCCAAC                     | CTGGAGGTGACCCTGTGAC                       | 296       | 34   | 2320                | 2400 |
| 54       | GGCAGGTAGCTCAGACCAT                       | GTCAGGAGACTCTGGGGAT                       | 182       | 34   | 2365                | 2415 |
| 55       | GCTGAGGGAACCCAGT                          | TGTTCTCAGCAGCATTACA                       | 283       | 34   | 2410                | 2471 |

Primer sequences for PCR amplification of *NOTCH2* gene C-terminus exon regions are shown. PCR primers were designed to amplify 200-300 base-pair products within *NOTCH2* coding regions with sufficient overlapping coverage between adjacent fragments to ensure reliable base-calling. For sequencing reactions, nested primer sequences offset by 3-4 nucleotides from the corresponding amplification primer were used to improve sequencing specificity. Product sizes as well as exon and amino acid residue coverage are also listed.

**Table S4.** Nested primers used for Sanger sequencing.

| Fragment | Forward Primer Sequence for Sequencing | Reverse Primer Sequence for Sequencing |
|----------|----------------------------------------|----------------------------------------|
| 34       | AGGTTTTCTAGAAACCTCAAAC                 | AATACTGGCTCAGACAGGTGG                  |
| 35       | CAGGCTGTGCCAGTAGCCC                    | TGCAGGCCTCATCACAGACG                   |
| 36       | GCCGCTGTGAACTCTACACG                   | AAACTGAAGTGTGTTAGTGACAGT               |
| 37       | CCAGTCTAATCTGAGCTCTTTTG                | TGGCATCAATACCACAATAA                   |
| 38       | CAACAGTGAGGAGTGTGGTT                   | CTTGAAGTTCAGAAACCAACA                  |
| 39       | CATGTTCTGCCTGACCTGCAC                  | CCTTTACACCACTGCCACTC                   |
| 40       | AATGCTGACATTGAGAGGTTAAT                | AGAGCCATGCTTACGCTTTCG                  |
| 41       | CTGTTGTCATCATTCTGTTTAT                 | ATGATTCAACAAGATATGCTTTT                |
| 42       | CATGGTGGAAAGTGTGAAAA                   | TAATGGCTGACAATGGTGGTTC                 |
| 43       | AATGGGAGATAAGCAGCGGTGGAGGCTC           | ACAATGTGGAACCATGGGCA                   |
| 44       | TAGAGCTGTTTCAACCATAGGGTT               | GCATCTGCACCTGCATCCAGG                  |
| 45       | GCAGAGGACTCTTCTGCTAACA                 | ATTCAAGTGACTTCTCATGTTCTTTACC           |
| 46       | ACTGTAGCCTCAGCTCTGATGCCC               | ATCCCTGCCTTTCATCCCTA                   |
| 47       | GTGCAAGTCATAGTGTCTTATAC                | GGGCTTATAACTGAGGCACTGC                 |
| 48       | AGAGTGTTATTAACATGTGTTCTGTG             | AGGCTGAGGAAAGATCTGTTGG                 |
| 49       | ATGCACCATGACATTGTGCG                   | AAAGTTACTGAACTCTCAGACAGTT              |
| 50       | CAAGGAGGCAAAGGATGCCAA                  | CTGAGGGAAGCACAGTGCTG                   |
| 51       | ATCTTACAGGCCTCACCCAA                   | GACCATACCAACATCTCAT                    |
| 52       | ATGGAGGTGAATGAGACCC                    | CCATTTCTGGAATCTGGTACAT                 |
| 53       | AGGCAGTATTGCCAACCCAGC                  | AGGTGACCACTGTGACTGGG                   |
| 54       | GGTAGCTCAGACCATTCTC                    | GGAGACTCTGGGGATGGTG                    |
| 55       | AGCGAACCCAGTCACA                       | CCTCAGCAGCATTACAAAAG                   |

Primer sequences for PCR amplification of *NOTCH2* gene C-terminus exon regions are shown. PCR primers were designed to amplify 200-300 base-pair products within *NOTCH2* coding regions with sufficient overlapping coverage between adjacent fragments to ensure reliable base-calling. For sequencing reactions, nested primer sequences offset by 3-4 nucleotides from the corresponding amplification primer were used to improve sequencing specificity. Product sizes as well as exon and amino acid residue coverage are als
